# Supplementary material for: An Ultraconserved Element Containing lncRNA Preserves Transcriptional Dynamics and Maintains ESC Self-Renewal
Source: PubMed Central journal article supplement — Stem Cell Reports. 2018 Feb 15;10(3):1102–14. doi: 10.1016/j.stemcr.2018.01.014 (PMC5918197; doi:10.1016/j.stemcr.2018.01.014), 2018-02-15
Supplement: mmc4.pdf [file mmc4.pdf]

# An Ultraconserved Element Containing lncRNA Preserves Transcriptional Dynamics and Maintains ESC Self-Renewal

Alessandro Fiorenzano,<sup>1,2,6,7</sup> Emilia Pascale,<sup>1,2,6</sup> Miriam Gagliardi,<sup>2</sup> Sara Terreri,<sup>2</sup> Mariarosaria Papa,<sup>2</sup> Gennaro Andolfi,<sup>1,2</sup> Marco Galasso,<sup>3</sup> Guidantonio Malagoli Tagliazucchi,<sup>4</sup> Cristian Taccioli,<sup>5</sup> Eduardo Jorge Patriarca,<sup>1,2</sup> Amelia Cimmino,<sup>2</sup> Maria Rosaria Matarazzo,<sup>2</sup> Gabriella Minchiotti,<sup>1,2,\*</sup> and Annalisa Fico<sup>1,2,\*</sup>

<sup>1</sup>Stem Cell Fate Laboratory, Institute of Genetics and Biophysics “A. Buzzati-Traverso”, CNR, 80131 Naples, Italy

<sup>2</sup>Institute of Genetics and Biophysics “A. Buzzati-Traverso”, CNR, 80131 Naples, Italy

<sup>3</sup>Biosystems Analysis, LTTA, Department of Morphology, Surgery and Experimental Medicine, University of Ferrara, 44121 Ferrara, Italy

<sup>4</sup>National Institute of Molecular Biology, “Romeo ed Enrica Invernizzi”, 20122 Milan, Italy

<sup>5</sup>Animal Medicine, Production and Health Department, University of Padua, 35020 Padua, Italy

<sup>6</sup>Co-first author

<sup>7</sup>Present address: Department of Experimental Medical Science and Lund Stem Cell Center BMC, Lund University, 22632 Lund, Sweden

\*Correspondence: [gabriella.minchiotti@igb.cnr.it](mailto:gabriella.minchiotti@igb.cnr.it) (G.M.), [annalisa.fico@igb.cnr.it](mailto:annalisa.fico@igb.cnr.it) (A.F.)

<https://doi.org/10.1016/j.stemcr.2018.01.014>

## SUMMARY

Ultraconserved elements (UCEs) show the peculiar feature to retain extended perfect sequence identity among human, mouse, and rat genomes. Most of them are transcribed and represent a new family of long non-coding RNAs (lncRNAs), the transcribed UCEs (T-UCes). Despite their involvement in human cancer, the physiological role of T-UCes is still unknown. Here, we identify a lncRNA containing the uc.170+, named T-UCstem1, and provide *in vitro* and *in vivo* evidence that it plays essential roles in embryonic stem cells (ESCs) by modulating cytoplasmic miRNA levels and preserving transcriptional dynamics. Specifically, while T-UCstem1:miR-9 cytoplasmic interplay regulates ESC proliferation by reducing miR-9 levels, nuclear T-UCstem1 maintains ESC self-renewal and transcriptional identity by stabilizing polycomb repressive complex 2 on bivalent domains. Altogether, our findings provide unprecedented evidence that T-UCes regulate physiological cellular functions and point to an essential role of T-UCstem1 in preserving ESC identity.

## INTRODUCTION

Evolutionary conservation has become more and more a powerful tool to identify functionally important sequences in the genome (Dermitzakis et al., 2005). In this context, the ultraconserved elements (UCEs) are 481 genomic segments longer than 200 base pairs (bp), which are fully conserved (100% identity with no insertions or deletions) between human, mouse, and rat genomes (Bejerano et al., 2004). This complete conservation led to the hypothesis that UCEs likely have biological functions fundamental to mammal cells (Katzman et al., 2007). Despite extensive studies, our knowledge of UCEs is still limited. Indeed, increasing evidences indicate that UCEs play different functions in vertebrate genomes, acting as enhancer (Paparidis et al., 2007; Pennacchio et al., 2006), splicing (Ni et al., 2007), and epigenetic regulators (Bernstein et al., 2006; Lee et al., 2006), or functioning as transcriptional coactivators (Feng et al., 2006). In particular, many UCEs act as long-range enhancers during mouse development (Pennacchio et al., 2006), and it has been proposed that their removal *in vivo* would lead to a significant phenotypic impact. Nevertheless, knockout studies performed so far indicate that UCEs are dispensable for mice viability (Ahituv et al., 2007; Nobrega et al., 2004).

A large fraction of UCEs are transcribed (T-UCes) in a tissue specific manner, and are deregulated in several human cancers (Calin et al., 2007; Fabbri et al., 2008; Fassan et al., 2014; Olivieri et al., 2016). Indeed, it has been shown that T-UCes may also act as long non-coding RNAs (lncRNAs) regulating other RNAs (Calin et al., 2007; Liz et al., 2014). The main molecular mechanism of T-UCes activity described so far is the “decoy” function. Indeed, T-UCes sequester microRNAs (miRNAs) from the cytoplasm and eventually regulate cancer cell proliferation (Calin et al., 2007; Galasso et al., 2014; Olivieri et al., 2016). All together these findings provided robust evidence supporting the functional role of T-UCes in the human genome, and highlighted a link between these genomic elements and human disease. Nevertheless, currently very little is known on the physiological role of this specific class of lncRNAs, as for instance in stem cell biology (Dinger et al., 2008; Feng et al., 2006; Mattick and Makunin, 2005).

Of note, several lncRNAs, including Hotair (Rinn et al., 2007), lincRNA-RoR (Loewer et al., 2010), Dali, MALAT1, Evf-2, and Nkx2.2AS (Chalei et al., 2014; Dinger et al., 2008; Guan et al., 2013; Ng et al., 2012; Ng and Stanton, 2013), are implicated in stemness and cell fate determination, even though their functional characterization is still incomplete. In this scenario, there is a lack of studies that directly investigate the potential role of T-UC family

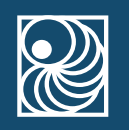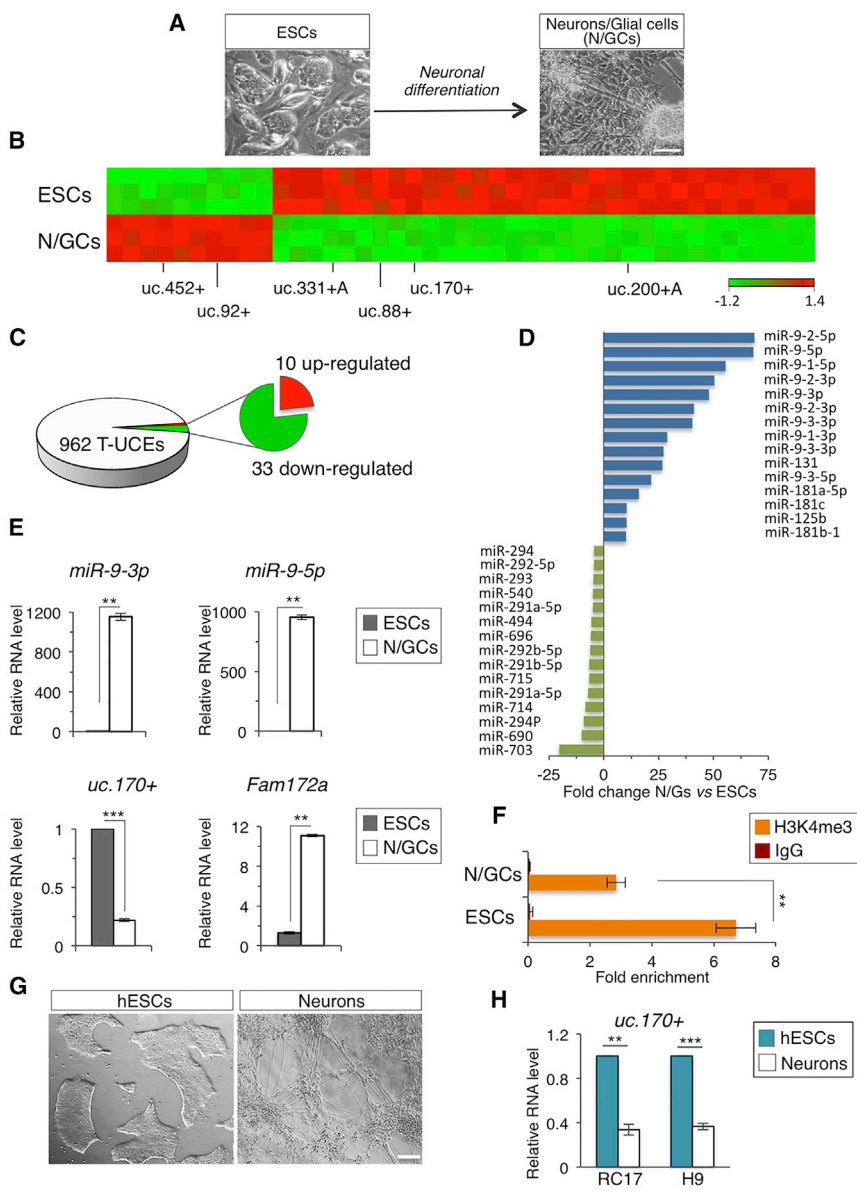

**Figure 1. Genome-wide Expression Profiling of T-UCes and miRNAs in ESC Differentiation**

(A) Schematic representation and representative photomicrographs of the ESC neural differentiation. Scale bar, 100  $\mu$ m.

(B) Heatmap diagram of differentially expressed sense (+) and antisense (+A) T-UCes, in ESC-derived neurons/glial cells (N/GCs) versus undifferentiated cells (ESCs) ( $p < 0.001$ ; two-sample t test). Randomly selected T-UCes are indicated among all the deregulated.

(C) Microarray-based pie chart representing global distribution of differentially expressed T-UCes in N/GCs versus ESCs.

(D) Bar plot showing the differentially expressed miRNAs in N/GCs versus ESCs with the largest change in expression ( $p < 0.001$ ; two-sample t test).

(E) qRT-PCR analysis of *miR-9-5p/3p*, *uc.170+*, and *Fam172a* in ESCs and N/GCs. Relative RNA level was normalized to either *Gapdh* or *U6* for coding/non-coding genes, respectively. Data are mean  $\pm$  SEM ( $n = 3$  independent experiments); \*\* $p < 0.005$ , \*\*\* $p < 0.001$ .

(F) ChIP-qPCR of H3K4me3 at *uc.170+* (*ultraconserved region*) locus in ESCs and N/GCs. Data are mean  $\pm$  SEM ( $n = 3$  independent experiments); \*\* $p < 0.01$ .

(G) Representative photomicrographs of the human ESC neural differentiation. Scale bar, 200  $\mu$ m.

(H) qRT-PCR analysis of *uc.170+* in human ESCs and human neurons (RC17 and H9 are two different human ESC lines). Relative RNA level was normalized to *U6*. Data are mean  $\pm$  SEM ( $n = 3$  independent experiments); \*\* $p < 0.005$ , \*\*\* $p < 0.001$ . See also Figure S1.

members in molecular mechanisms orchestrating the balance between proliferation and differentiation of mouse embryonic stem cells (ESCs).

Here, we provide evidence of a functional role of T-UCes in maintaining ESC self-renewal and get mechanistic insights into this process.

## RESULTS

### Genome-wide Profiling Reveals T-UCes Differentially Expressed during ESC Neural Differentiation

To investigate the role of UCes in ESC self-renewal/differentiation, we first searched for T-UCes differentially expressed

in undifferentiated versus differentiated ESCs. To this end, we performed a genome-wide expression profile analysis of T-UCes in ESC neural differentiation (Fico et al., 2008) by using a custom microarray designed to study the expression of both T-UCes and miRNAs (Calin et al., 2007; Lujambio et al., 2010) and compared terminally differentiated cells (neurons and glia cells) with undifferentiated ESCs (Figure 1A). Interestingly, out of the 962 T-UCes, only 43 were differentially expressed ( $p < 0.001$ ), the large majority of which (77%) were downregulated (Figures 1B and 1C; Table S1), whereas  $\approx 150$  miRNAs resulted differentially expressed ( $p < 0.001$ ) (Figure 1D; Table S1). Of note, miR-9 was the most upregulated miRNA on the array (Figure 1D), which was in line with the role of this miRNA

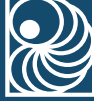

family, both in the developing and adult vertebrate brain (Coolen et al., 2013). The microarray results were validated by qRT-PCR of randomly selected T-UCs (uc.170+, uc.88+, uc.331+ A, uc.200+ A, uc.92+, and uc.452+) and miRNAs (miR-9-3p/5p, miR-714, miR-494, miR-181a, miR-411-5p, and miR-135b-5p) (Figures 1E, S1A, S1B, and S1C). Based on the T-UC::miRNA functional interaction described in cancer cells (Calin et al., 2007; Olivieri et al., 2016), we hypothesized that such interaction may also occur in ESCs. Therefore, we focused our attention on the most upregulated miRNA family, and identified putative miR-9 target sites in the differentially expressed T-UCs by using miRBase software. Specifically, we focused on the 33 T-UCs that showed a negative correlation with miR-9, i.e., they were downregulated in ESC differentiation, and selected the uc.170+, which showed the lower *minimum free energy* of binding to both the mature forms of miR-9 ( $\Delta G$ :  $-27$  kcal/mol and  $-14.8$  kcal/mol for miR-9-5p and miR-9-3p, respectively) (Rehmsmeier et al., 2004) (Figure S1D).

In mouse, uc.170+ is localized on chromosome 13 within intron 6 of the *Fam172a* host gene on the opposite strand (Figure S1E); uc.170+ and *Fam172a* transcripts showed opposite expression profiles. Indeed, while uc.170+ expression was downregulated in ESC neuronal differentiation, *Fam172a* strongly increased (Figure 1E). We also examined the chromatin status at the uc.170+ locus by performing chromatin immunoprecipitation analysis (ChIP)-qPCR. Consistent with the expression profile of uc.170+, we found a specific enrichment of H3K4me3 in undifferentiated ESCs that was reduced in differentiated cells (Figure 1F).

Bioinformatic analysis of the genomic region 5' upstream of the uc.170+ predicted a promoter region located at about 1.5 kb upstream of the uc.170+ that was not described so far, based on the presence of a TATA box, a transcriptional initiator (Inr), and/or a transcription start site (Figure S1E). The predicted transcript containing the uc.170+ (T-UCstem1) was validated by northern blot analysis (Figure S2A). Furthermore, by using rapid amplification of cDNA ends-PCR analysis followed by sequencing, we identified the 5' and 3' extremities of the unspliced transcript and determined that its length is 1813 bp (Chr13: 78031716–78033528, strand –; Figure S2B). Analysis of secondary structure prediction using two different algorithms showed that T-UCstem1 is able to form a complex secondary structure with several highly stable stem-loops, thus explaining the size of the transcript under native conditions (Figures S2C and S2A).

Finally, we found that T-UCstem1 was expressed also in hESCs, and it was downregulated upon neuronal differentiation (Figures 1G and 1H), suggesting that it may similarly regulate human ESCs.

### Direct and Functional Interaction of T-UCstem1 and miR-9

To assess whether there is a functional interaction between T-UCstem1 and miR-9, we performed a luciferase assay in 293FT cells. To this end, the uc.170+ was cloned in a luciferase reporter vector and co-transfected either with mimics of the mature forms of miR-9(3p/5p) or with a scrambled control (Figure 2A). The luciferase activity was significantly reduced in the presence of miR-9(3p/5p), which was consistent with the computationally predicted T-UCstem1::miR-9 interaction (Figure 2A). Furthermore, site directed mutagenesis of the miR-9-3p and miR-9-5p seed sequences confirmed the specificity of the T-UCstem1::miR-9 interaction (Figure 2A). To get further insights into the T-UCstem1::miR-9-3p/5p interaction, we extended the analysis to ESCs. First, we quantified the exact copy numbers of T-UCstem1 and miR-9 per cells in self-renewing ESCs by qRT-PCR. The mature miR-9 was present at a copy number of  $9.6 \pm 2.1$  molecules/cell, which was significantly lower than T-UCstem1 ( $112 \pm 13.8$  copies/cell; Figure 2B), thus supporting the idea that T-UCstem1 may be able to function as a sponge for miR-9 (Wang et al., 2013). We therefore transfected ESCs with miR-9-3p/5p and assessed the expression of both T-UCstem1 and the miR-9 targets *Lin28b*, *Tlx1*, and *Hes1* (Zhao et al., 2009, 2010; Coolen et al., 2013) (Figure 2C). T-UCstem1 expression was strongly reduced already at 24 hr after transfection (Figure 2D), thus providing further evidence of a functional interaction between T-UCstem1 and miR-9 also in ESCs. Interestingly, while the expression of pluripotency genes (*Nanog*, *Sox2*, and *Oct4*) was comparable (Figure 2E), proliferation was reduced in miR-9 compared with scramble-transfected ESCs (Figure 2F). This observation prompted us to further investigate this phenotype. Consistently, cell-cycle distribution analysis of miR-9-transfected ESCs showed a significant G1-phase accumulation before S-phase progression compared with control, which was accompanied by a robust reduction in G2/M phase (Figure 2G). This was also confirmed by 5-ethynyl-2'-deoxyuridine/propidium iodide (PI) double staining, which showed an enlargement of the S1 subphase in miR-9-transfected ESCs (21% miR-9-transfected ESCs versus 11% Control) (Figure 2H).

To further analyze this phenotype and to evaluate the role of T-UCstem1 without altering the enhancer activity of genomic uc.170 (Pennacchio et al., 2006), we generated stable T-UCstem1 knockdown (KD) ESC clones using custom-designed short hairpin RNAs (shRNAs) targeting non-overlapping regions of the transcript (SH1-3; Figure S1E) that markedly reduced ( $\geq 70\%$  of reduction) T-UCstem1 expression (Figures 2I and S2A). We first evaluated the effect of T-UCstem1 KD on the expression of the host gene *Fam172a* and two neighbor genes, *Pou5f2* and

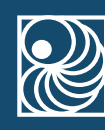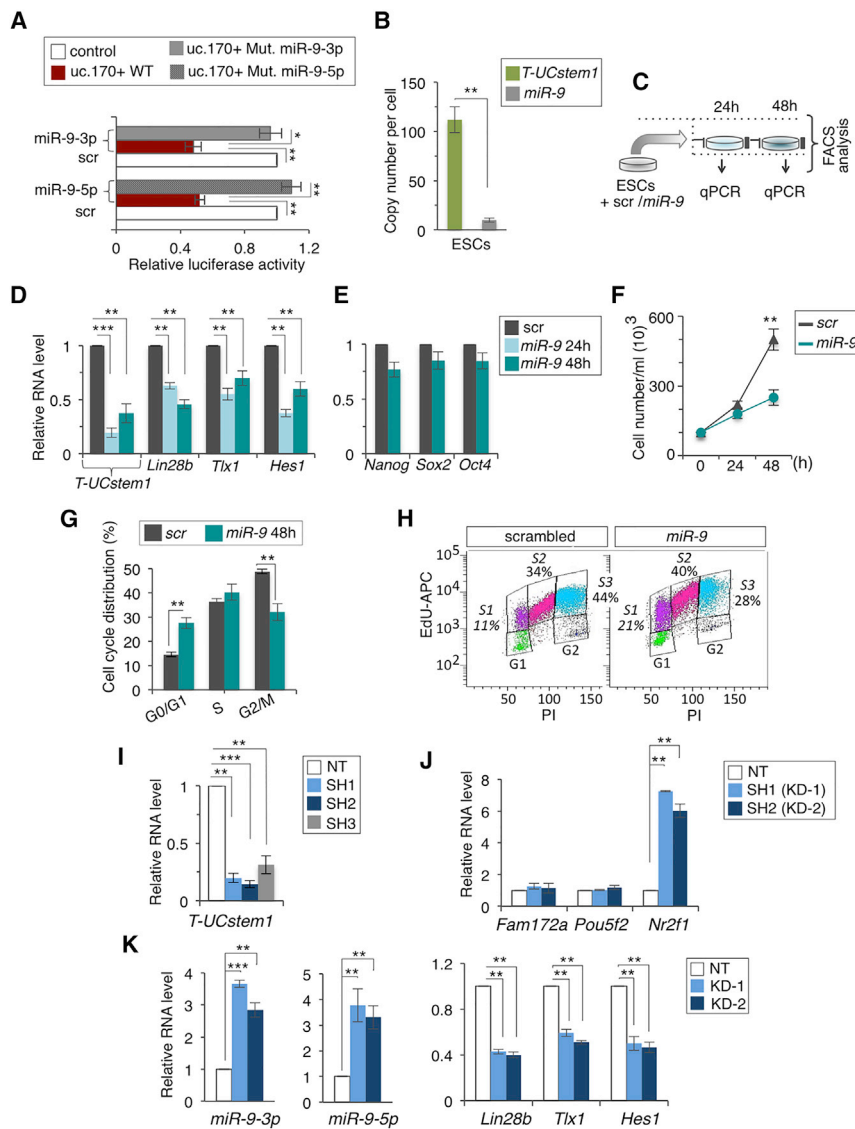

**Figure 2. Functional Interaction of T-UCstem1 and miR-9 in ESCs**

(A) Luciferase reporter assay with Renilla luciferase under control of uc.170+ sequence wild-type (WT) or mutant (Mut) co-transfected with miR-9-5p/3p or scrambled (scr) miRNA (100 nmol) in 293FT cells. The luciferase activity of Firefly was used as internal control. Data are mean  $\pm$  SEM (n = 3 independent experiments); \*p < 0.01, \*\*p < 0.005.

(B) T-UCstem1 and miR-9 copy number per cell quantified with qRT-PCR in ESCs. Data are mean  $\pm$  SEM (n = 3 independent experiments); \*\*p < 0.005.

(C) Schematic representation of the experimental procedure.

(D and E) qRT-PCR analysis of (D) T-UCstem1, miR-9 targets (*Lin28b*, *Tlx1*, and *Hes1*), and (E) pluripotency-associated genes (*Nanog*, *Sox2*, and *Oct4*) in ESCs transfected with miR-9 or scr (100 nmol) for 24 and/or 48 hr. Data are mean  $\pm$  SEM (n = 3 independent experiments); \*\*p < 0.005, \*\*\*p < 0.001.

(F) Automated cell counting of miR-9 and Control (scr) transfected ESCs at 24 and/or 48 hr. Data are mean  $\pm$  SEM (n = 3 independent experiments); \*\*p < 0.005.

(G and H) FACS-based cell-cycle distribution analysis of ESCs transfected with miR-9 or miRNA scr for 48 hr (G) after PI or (H) after double 5-ethynyl-2'-deoxyuridine (EdU)/propidium iodide (PI) staining (representative FACS plots of biological duplicates are shown). \*\*p < 0.005.

(I and J) qRT-PCR analysis of (I) T-UCstem1, (J) host and neighbor genes (*Fam172a*, *Pou5f2*, and *Nr2f1*) in NT and independent T-UCstem1 KD ESC clones. Relative RNA level was normalized to either *Gapdh* or *U6* for

coding/non-coding genes, respectively. Data are mean  $\pm$  SEM (n = 3 independent experiments); \*\*p < 0.005, \*\*\*p < 0.001. (K) qRT-PCR analysis of miR-9-3p/5p and its target genes, *Lin28b*, *Tlx1*, and *Hes1*. Relative RNA level was normalized to either *Gapdh* or *U6* for coding/non-coding genes, respectively. Data are mean  $\pm$  SEM (n = 3 independent experiments); \*\*p < 0.005, \*\*\*p < 0.001. See also Figures S1 and S2.

*Nr2f1*. *Fam172a* was expressed at comparable levels in TUCstem1 KD (KD-1 and KD-2) and in Control ESCs, showing that T-UCstem1 does not regulate the host gene mRNA levels (Figure 2J). Of note, *Nr2f1*, but not *Pou5f2*, was significantly overexpressed in T-UCstem1 silenced ESCs (Figure 2J). Furthermore, we found a significant and consistent increase of both miR-9 mature forms upon T-UCstem1 KD (Figure 2K) and a consequential downregulation of the miR-9 targets *Lin28b*, *Tlx1*, and *Hes1* (Figure 2K).

Altogether, these findings provide evidence of a functional interplay between T-UCstem1 and miR-9 in ESCs,

and show that increased miR-9 cellular levels affect ESC proliferation.

### T-UCstem1 Controls ESC Proliferation by Modulating miR-9 Intracellular Levels

To further investigate the functional role of T-UCstem1 in ESCs, we analyzed the molecular and cellular features of T-UCstem1 KD ESCs. Under FBS/Lif/Feeders culture conditions, T-UCstem1 KD ESC colonies appeared flat, disorganized, and smaller in size compared with Control, which conversely showed the expected domed and tightly packed



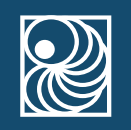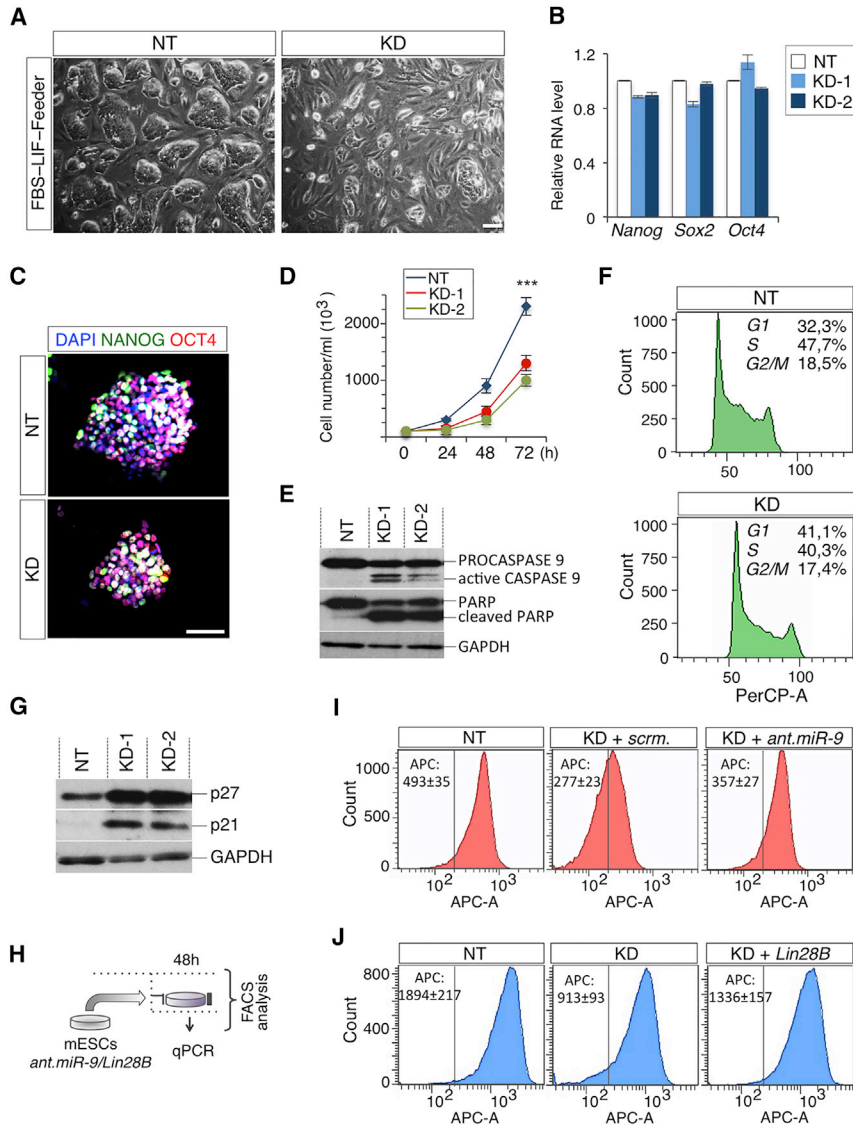

**Figure 3. T-UCstem1 Depletion Affects ESC Cell Proliferation and Induces Apoptosis**

(A) Representative photomicrographs of FBS/LIF/Feeders non-targeted (NT) and T-UCstem1 KD (KD) ESCs. Scale bar, 100  $\mu$ m. (B) qRT-PCR of pluripotency genes (*Nanog*, *Sox2*, and *Oct4*) in Control and two independent KD ESC clones. Relative RNA level was normalized to *Gapdh*. Data are mean  $\pm$  SEM (n = 3 independent experiments).

(C) Representative pictures of OCT4/NANOG double immunostaining of NT and KD ESCs. Nuclei were stained with DAPI. Scale bars, 75  $\mu$ m.

(D) Time course analysis of automated cell counting of FBS/LIF/Feeders Control (NT) and KD ESCs. Data are mean  $\pm$  SEM (n = 3 independent experiments); \*\*\*p < 0.001.

(E) Western blot analysis of PROCASPASE/active CASPASE9 and PARP full-length form and cleaved fragment in Control (NT) and two independent T-UCstem1 KD ESC clones. GAPDH was used as loading controls.

(F) Cell-cycle distribution by PI incorporation in Control and KD ESCs. Representative FACS plots of biological triplicates are shown.

(G) Western blot analysis of cell-cycle inhibitors (p27 and p21) in Control (NT) and two independent T-UCstem1 KD ESC clones. GAPDH was used as a loading control.

(H) Schematic representation of the experimental procedure.

(I and J) FACS-based analysis of cell proliferation quantification by EdU incorporation in NT and in KD ESCs upon antagomiR-9 5p/3p/*scr* (100 nmol) (I) or *Lin28B*-Flag/empty vector at 48 hr after transfection (J). Representative FACS plots of biological triplicates are shown. Data are mean  $\pm$  SEM. See also Figure S3.

phenotype (Figure 3A). Expression levels of the pluripotency triad *Oct4-Sox2-Nanog* was comparable in KD and non-targeted (NT) ESCs (Figures 3B and 3C); however, T-UCstem1 KD ESCs showed reduced proliferation rate (Figure 3D), which was accompanied by reduced cell viability (Figure S3A) and induced apoptosis, as shown by CASPASE9 activation and PARP cleavage (Figure 3E). Furthermore, PI staining showed accumulation of T-UCstem1 KD ESCs in G1 phase, which eventually resulted in S-phase pauperization (Figure 3F). Accordingly, the expression of cell-cycle inhibitors p27 and p21 was strongly upregulated in T-UCstem1 KD cells compared with NT Control (Figure 3G). This mutant phenotype was further supported by carboxy-

fluorescein succinimidyl ester (CFSE) staining, which tracks cell division in living cells over the time (Ramírez et al., 2011) (Figures S3B–S3D). Interestingly, small interfering RNA-based knockdown of T-UCstem1 in hESCs (Figure S3F) resulted in decreased colony size and reduced cell proliferation rate (Figures S3G and S3H), suggesting a conserved role of T-UCstem1 in hESCs.

We then asked if *uc.170+* overexpression was able to rescue the molecular and functional phenotype of T-UCstem1 KD ESCs. Interestingly, *uc.170+* overexpression fully rescued *mir-9* levels and expression of the target genes (*Lin28b* and *Tlx1*; Figures S3I and S3J), as well as T-UCstem1 KD colony size and proliferation rate (Figures S3K and S3L).

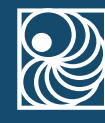

Of note, mir-9 overexpression (Figures 2D–2I) and T-UCstem1 depletion (Figures 3D, 3F, and 3G) similarly affected ESC proliferation, thus suggesting that T-UCstem1 KD phenotype could be due to increased mir-9 levels. To test this hypothesis, T-UCstem1 KD ESCs were transfected with antagomiR-9 or scrambled control (Figure 3H). AntagomiR-9 reduced miR-9 levels and restored *Lin28b* and *Tlx1* expression in T-UCstem1 KD ESC (Figures S4A and S4B), and rescued proliferation (Figures 3I and S4C). Furthermore, overexpression of the miR-9 target gene *Lin28b* (Figures S4D and S4E) was also able to fully rescue T-UCstem1 KD ESC proliferation (Figures 3H and 3J).

All together, these data demonstrate that a T-UCstem1/miR-9/*Lin28b* axis controls cell-cycle progression in ESCs.

### T-UCstem1 Preserves ESC Self-Renewal Properties *In Vitro* and *In Vivo*

Despite their morphology and altered proliferation rate, FBS/Lif/Feeders T-UCstem1 KD ESCs retained a proper expression of pluripotency markers (Figures 3B and 3C). Nevertheless, when T-UCstem1 KD ESCs were plated at low density in colony-formation assay, and in the absence of feeders (Paling et al., 2004), colonies with a flat morphology massively increased at the expense of the classical domed colonies (Figure 4A), and this effect was exacerbated already after one passage in culture (Figures S4F and S4G). In line with these observations, expression of pluripotency factors was strongly reduced in T-UCstem1 KD ESC colonies in these culture conditions (FBS/Lif, low density) (Figures 4B, 4C, and S4H–S4J). Interestingly, this correlated with a significant increase in the expression of cell lineage commitment genes (i.e., *Fgf5*, *Brachyury*, *Sox17*, *Foxa2*, *Sox1*, and *Nestin*) at both RNA (Figure 4C) and protein (Figure 4D) levels.

We then asked whether this phenotype could be rescued in *2i* (CHIR99021 + PD0325901) culture conditions (Guo et al., 2009). Intriguingly, while T-UCstem1 KD ESC self-renewal was fully rescued in *2i*, as indicated by alkaline phosphatase staining (Figure 4E) and expression of pluripotency-associated genes (Figures S4K and 4F), the reduced proliferation rate (Figure S4L), as well as the expression of cell-cycle inhibitor p21 persisted (Figure 4F), thus suggesting that different mechanisms control T-UCstem1-dependent regulation of ESC proliferation and self-renewal.

In line with our *in vitro* findings that T-UCstem1 silencing affected ESC proliferation and self-renewal, but not pluripotency, T-UCstem1 KD ESCs generated teratomas significantly smaller in size compared with Control, but not different in histological composition (Figures 4H and 4I). Furthermore, EGFP-labeled T-UCstem1 KD ESCs efficiently contributed to chimeric embryos upon injection into morula (Figures 4G and S5A; eight out of nine embryos analyzed).

Altogether, these findings provide evidence of a crucial role of T-UCstem1 in preserving ESC self-renewal and proliferation both *in vitro* and *in vivo*, without affecting pluripotency.

### T-UCstem1 Silencing Accelerates and Enhances ESC Differentiation

To further assess the functional role of T-UCstem1 in ESCs, we evaluated the impact of T-UCstem1 KD on ESC differentiation. A time course analysis of ESC neural differentiation showed a significant difference in the differentiation kinetics of T-UCstem1 KD and Control ESCs. Specifically, neural and glial differentiation strongly increased in T-UCstem1 KD ESCs compared with Control (Figure 5A). Indeed, markers of neural precursors (*Sox1* and *Nestin*), fully differentiated neurons ( $\beta$ III-tubulin), and glial cells (glial fibrillary acidic protein) were all upregulated in T-UCstem1 KD ESCs already at earlier time points of differentiation (Figures 5B and 5C), suggesting that differentiation was accelerated in T-UCstem1 KD cells. Consistently, while Oct4 was downregulated in T-UCstem1 KD culture, its expression persisted in Control ESCs (Figure 5C). Finally, fluorescence-activated cell sorting (FACS) analysis showed increased neural and glial cells in T-UCstem1 KD culture, thus further supporting the idea that ESC differentiation was accelerated and was more efficient upon T-UCstem1 downregulation (Figure 5D). To further evaluate this phenotype, we evaluated the effect of T-UCstem1 KD on ESC cardiac differentiation. Time course expression analysis showed a transient upregulation (day 6) of the pan-mesodermal marker *Brachyury* in T-UCstem1 KD cultures, which progressively decreased (Figure S5B), and increased expression of both early (*Nkx2.5*) and late ( $\alpha$ -myosin heavy chain [ $\alpha$ MHC]) cardiac markers throughout differentiation (days 6–10; Figure S5B), suggesting that cardiac specification and differentiation was enhanced and accelerated. Accordingly, FACS analysis showed that *Brachyury*-positive cells were strongly reduced ( $10.8\% \pm 2.2\%$  KD versus  $21.1\% \pm 3.7\%$  Control) at day 8, while  $\alpha$ MHC (MF20)-positive cells almost doubled at day 10 ( $27\% \pm 3.7\%$  KD versus  $12.3\% \pm 3.1\%$  Control) in T-UCstem1 KD cell culture compared with Control (Figure S5C), which is in line with accelerated differentiation.

All together, these results indicate that T-UCstem1 is required to regulate ESC differentiation.

### T-UCstem1 Preserves the Transcriptional Dynamics of ESCs by Stabilizing PRC2 Complex

To get mechanistic insight into the role of T-UCstem1 in ESC self-renewal and differentiation, we compared RNA sequencing (RNA-seq) transcriptome profiling of FBS/Lif/Feeders T-UCstem1 KD and Control ESCs, and identified more than 1,000 deregulated genes (fold change  $\geq 2$ ;

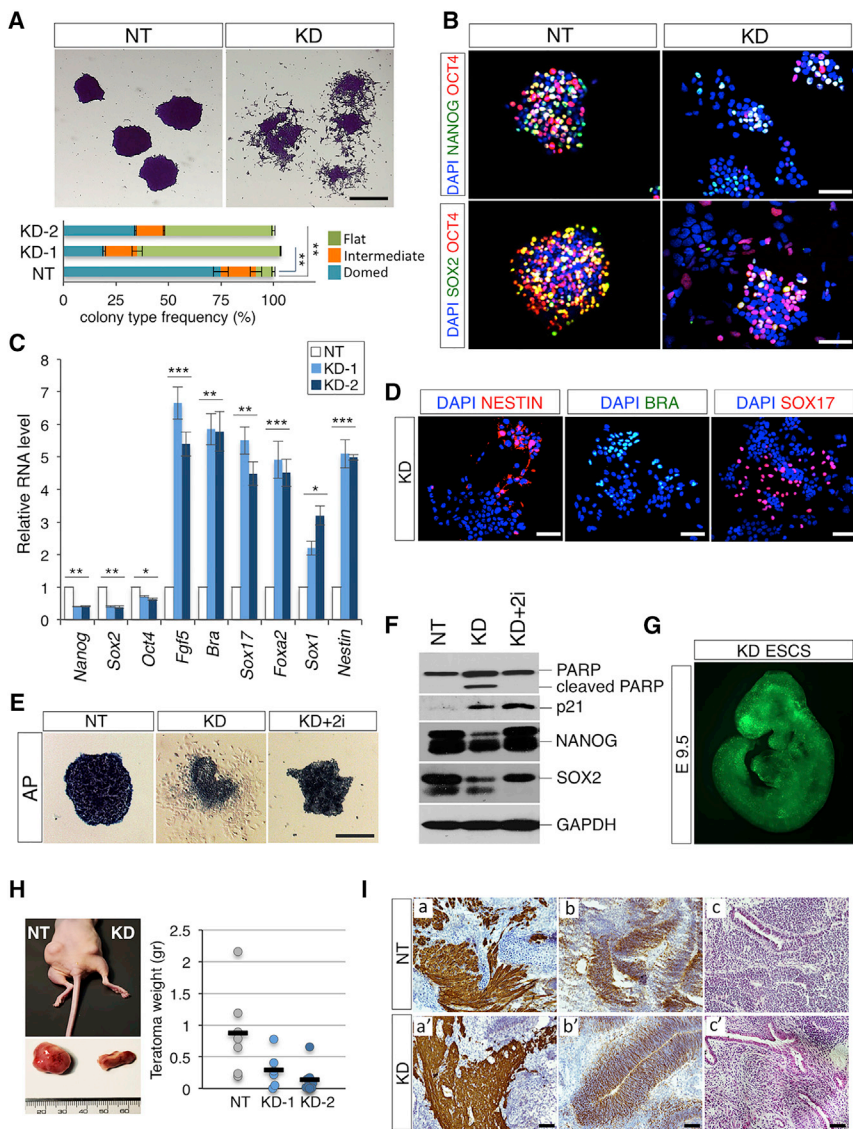

**Figure 4. T-UCstem1 Sustains ESC Self-Renewal *In Vitro* and *In Vivo***

(A) Representative pictures of crystal violet-stained and colony-type frequency (~100 colonies scored/condition) of colonies generated from Control (NT) and T-UCstem1 KD ESCs, at day 6 after plating. Data are mean  $\pm$  SEM (n = 3 independent experiments); \*\*p < 0.005. Scale bar, 100  $\mu$ m.

(B) Representative immunofluorescence of NANOG/OCT4 and SOX2/OCT4 of Control (NT) and KD ESC colonies at day 6 after plating. Nuclei were stained with DAPI. Scale bars, 75  $\mu$ m.

(C) qRT-PCR analysis of pluripotency (*Nanog*, *Sox2*, and *Oct4*), mesodermal (*Fgf5* and *Brachyury* [*Bra*]), neural (*Sox1* and *Nestin*), and endodermal-associated genes (*Foxa2* and *Sox17*) in Control (NT) and two independent T-UCstem1 KD ESC clones. Relative RNA level was normalized to *Gapdh* expression. Data are mean  $\pm$  SEM (n = 3 independent experiments); \*p < 0.01, \*\*p < 0.005, \*\*\*p < 0.001.

(D) Representative pictures of NESTIN, BRA, and SOX17 immunostaining in KD ESC colonies. Nuclei were stained with DAPI. Scale bars, 75  $\mu$ m.

(E) Representative pictures of alkaline phosphatase (AP)-stained colonies generated from Control (NT), KD, and KD + 2i (CHIR99021 + PD0325901) ESCs, at day 6 after plating. Scale bar, 100  $\mu$ m.

(F) Western blot analysis of PARP full-length form and cleaved fragment, p21, NANOG, and SOX2 in Control (NT), KD, and KD + 2i (CHIR99021 + PD0325901) ESCs, at day 6 after plating. GAPDH was used as a loading control.

(G) Representative photomicrograph by Axio Zoom.V16 Zeiss microscopy (original magnification  $\times$ 10) of chimeric embryos from EGFP-labelled T-UCstem1 KD ESCs injected into morula and dissected at embryonic day 9.5 (E9.5).

(H) Effect of T-UCstem1 depletion on teratoma formation. Representative picture of an immunodeficient mouse injected with Control (NT) and T-UCstem1KD ESCs, and the dissected ectopic tissues (left panel). Quantitative analysis of tissue weights (right panel). Data are mean  $\pm$  SEM (seven mice/group).

(I) Immunohistochemistry analysis showing tissues deriving from ectoderm (nestin; a, a'), mesoderm (MF-20; b, b'). Scale bars, 75  $\mu$ m., H&E staining displaying endoderm derivatives (glandular epithelial structures; c, c'). Scale bar, 150  $\mu$ m. See also Figures S4 and S5.

p < 0.05; Figure 6A; Table S2). Remarkably, gene ontology (GO) analysis showed striking enrichment in genes involved in regulation of cell proliferation, positive regulation of development, and positive regulation of cell differentiation (Figure 6B), which are in line with the functional role of T-UCstem1 (Figures 3, 4, and 5). The large majority of the deregulated genes were indeed upregulated (~70%) in T-UCstem1 KD ESCs compared with Control and, remarkably, ~50% were associated with bivalent chro-

matin domains (Figures 6C and 6D). Bivalent domains are characterized by the co-presence of the activating H3K4me3 and the repressive H3K27me3 histone marks, and are associated with silencing of developmental genes that would activate cell differentiation, while keeping these genes poised and ready to be induced (Bernstein et al., 2006). We thus first analyzed the status of H3K4me3 and H3K27me3 at the bivalent domains of *Nestin*, *Foxa2*, and *Gata6* genes in T-UCstem1 KD and Control ESCs by ChIP



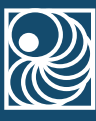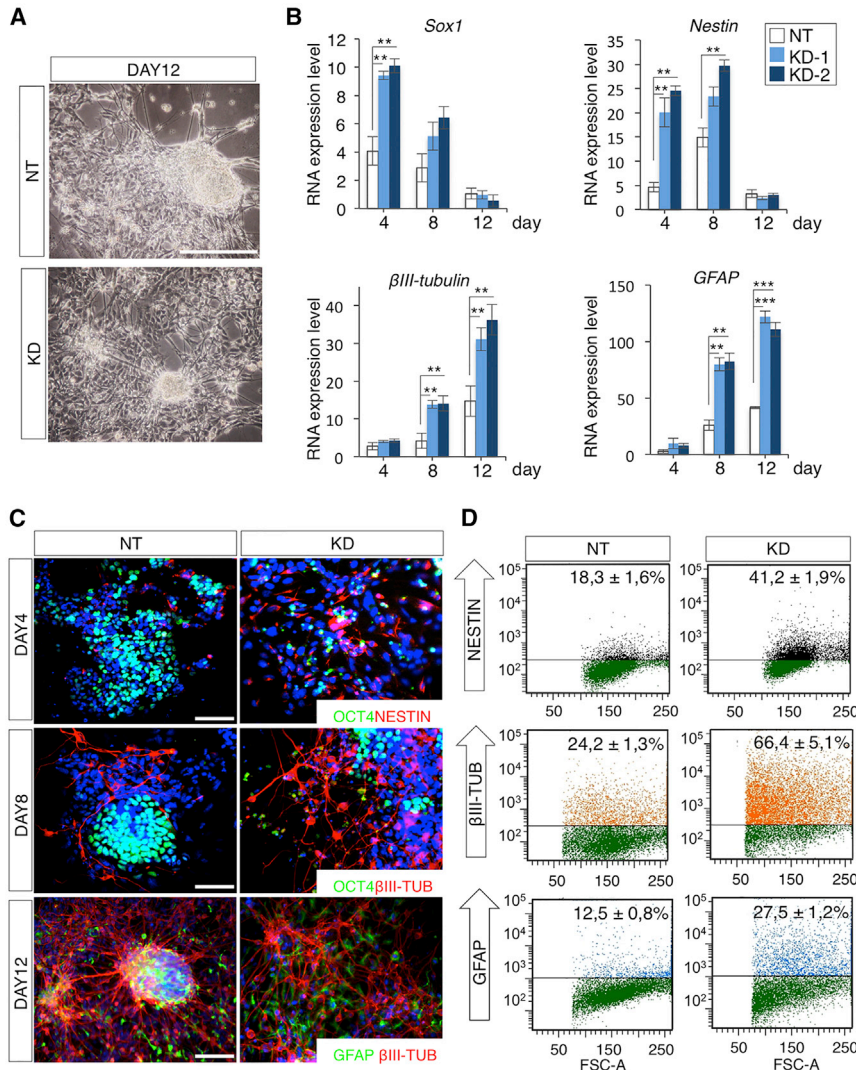

### Figure 5. T-UCstem1 Silencing Promotes ESC Neural Differentiation

(A) Representative photomicrographs of Control (NT) and T-UCstem1 KD (KD) ESCs differentiated in neurons. Scale bar, 100  $\mu$ m.

(B) Time course expression profiles of neural (*Sox1*, *Nestin*, and  $\beta$ III-tubulin) and glial (*GFAP*) markers in Control (NT) and two independent T-UCstem1 KD clones. RNA expression level was normalized to *Gapdh* expression. Data are mean  $\pm$  SEM ( $n = 3$  independent experiments); \*\* $p < 0.005$ , \*\*\* $p < 0.001$ .

(C) Representative pictures of OCT4/NESTIN, OCT4/ $\beta$ III-TUBULIN, and GFAP/ $\beta$ III-TUBULIN double immunostaining in Control (NT) and KD ESC neural differentiation at the indicated time points. Nuclei were stained with DAPI. Scale bars, 75  $\mu$ m.

(D) FACS-based quantification of NESTIN (day 4),  $\beta$ III-TUBULIN (day 12), and GFAP (day 12) positive cells in Control (NT) and KD ESC neural differentiation. Data are mean  $\pm$  SEM ( $n = 3$  independent experiments). See also Figure S5.

analysis. In line with the expression data (Figures 6A and S6A), the H3K4me3/H3K27me3 ratio (De Gobbi et al., 2011) significantly increased in T-UCstem1 KD ESCs at the promoter of these representative genes of the three germ layers (Figure S6C). Of note, we found derepression of *Nestin*, *Foxa2*, and *Gata6* genes also in T-UCstem1 KD hESCs (Figure S6B), suggesting that T-UCstem1 function may be conserved in humans. Given the very well-documented role of polycomb repressive complex 2 (PRC2) in maintaining the bivalent domains in ESCs and the involvement of several lncRNAs in this mechanism (Margueron and Reinberg, 2011), we questioned whether T-UCstem1 could directly interact with the PRC2, and eventually regulate bivalent gene expression. To address this issue, we first analyzed the subcellular localization of T-UCstem1 by RNA subcellular fractionation. According to its interaction with miR-9 in ESCs, T-UCstem1 was detected in the cytoplasmic

fraction (Figure 6E). However, T-UCstem1 was also present both in the nuclear soluble and in the chromatin-associated fractions (Figure 6E), supporting the idea of a potential role of this lncRNA also in the nucleus. We then assessed whether T-UCstem1 might physically interact with components of PRC2, and carried out a crosslinked RNA immunoprecipitation using SUZ12 and EZH2 specific antibodies. We found that T-UCstem1 was able to specifically bind both SUZ12 and EZH2 proteins of PRC2 (Figure 6F). Native RIP carried out on cell lysate revealed that SUZ12 shows presumably higher affinity in this interaction than EZH2 (Figure S6D). These findings led us to hypothesize a role of T-UCstem1 in stabilizing the PRC2 complex on its target genes. To address this question, we analyzed SUZ12 and EZH2 binding on *Nestin*, *Foxa2*, and *Gata6* promoters by ChIP experiments and found that T-UCstem1 downregulation significantly reduced PRC2 occupancy on all the target



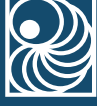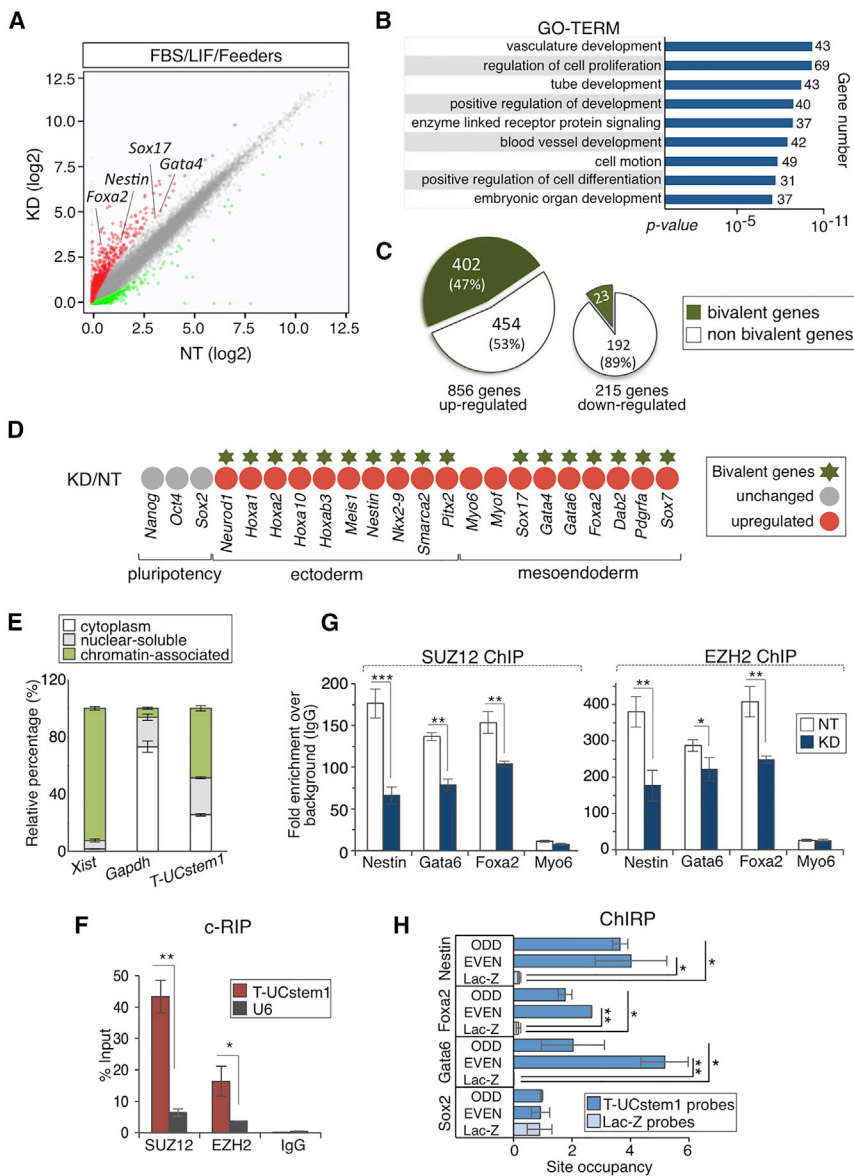

### Figure 6. T-UCstem1 Depletion Remodels the Epigenomic Signature of ESCs

(A) Scatterplot of RNA-seq data shows differentially expressed genes in T-UCstem1 KD (KD) versus Control (NT) ESCs. The gray circles delineate the boundaries of less than 2-fold difference in gene expression levels. Genes showing a significant ( $p < 0.05$ ) higher or lower expression level in KD versus NT ESCs are indicated as red and green circles, respectively. Three independent KD ESC clones were analyzed and the average values were reported in the plot.

(B) Gene ontology (GO) (<http://david.abcc.ncifcrf.gov>; setting as background the genes expressed in ESCs) of protein coding genes deregulated in KD versus Control (NT) ESCs.

(C) Chart showing a significant overlap between bivalent domain-associated genes and up-regulated genes in KD versus Control (*Hypergeometric test*;  $p < 10^{-16}$ ).

(D) Heatmap of up-regulated developmental genes in KD cells versus Control (NT).

(E) Total RNA from ESCs was separated into cytoplasmic, nuclear-soluble, and chromatin-bound fractions. The relative abundance of *T-UCstem1* in the different fractions was measured by qRT-PCR. *Gapdh* and *Xist* were analyzed as control. Data are mean  $\pm$  SEM ( $n = 3$  independent experiments).

(F) Crosslinked RNA immunoprecipitation (c-RIP) of *T-UCstem1* in ESCs, using antibodies against SUZ12, EZH2, or immunoglobulin (IgG) as control. U6 was analyzed as negative control. Data are mean  $\pm$  SEM ( $n = 3$  independent experiments); \* $p < 0.05$ , \*\* $p < 0.005$ .

(G) ChIP-qPCR of SUZ12 and EZH2 binding at selected genes in NT and KD cells. Myo6 promoter has been reported as control.

Data are mean  $\pm$  SEM ( $n = 3$  independent experiments); \* $p < 0.05$ , \*\* $p < 0.005$ , \*\*\* $p < 0.0005$ .

(H) ChIRP-qPCR for *T-UCstem1* in ESCs. Enrichments of *Nestin*, *Gata6*, *Foxa2*, and *Sox2* promoter regions were quantified in the chromatin fraction precipitated using biotinylated DNA probes complementary to *T-UCstem1* and *LacZ* as negative control. *Sox2* promoter has been reported as negative control. Data are mean  $\pm$  SEM ( $n = 3$  independent experiments); \* $p < 0.05$ , \*\* $p < 0.005$ . See also Figure S6.

sites analyzed (Figures 6G and S6E). Of note, SUZ12 and EZH2 protein levels were comparable in T-UCstem1 KD and Control ESCs (Figure S6F). To prove that T-UCstem1 interacts with *Nestin*, *Gata6*, and *Foxa2* genes showing changes in H3K4me3/H3K27me3 ratio, we performed chromatin isolation by RNA purification (ChIRP). We found a significant enrichment of T-UCstem1 at the target sites of PRC2 occupancy, while this enrichment was not detected at *Sox2* promoter (Figure 6H).

Overall, these data point to a key role of T-UCstem1 in maintaining ESC transcriptional identity by protecting the epigenetic status of key developmental regulatory genes, stabilizing PRC2 on their bivalent domains.

## DISCUSSION

This work provides evidence of a functional role of T-UCes in regulating the finely tuned balance between pluripotency



and differentiation in mouse ESCs. So far, the T-UCs have been mostly linked to cancer, whereas their physiological role is still poorly understood. Based on the hypothesis that the T-UC::miR interaction described in cancer cells can similarly occur in ESCs, we focused on uc.170+::miR9 since (1) uc.170+ carries the seed sequence for miR-9, and (2) uc.170+ and miR-9 expression inversely correlate in ESC neural differentiation. Here, we demonstrate that T-UCstem1 and miR-9 functionally interact and show that T-UCstem1::miR-9 interplay regulates ESC proliferation. According to our findings, recent data showed that miR-9 inhibits neural precursor cell and ESC proliferation by targeting *Tlx1* (Qu et al., 2010; Zhao et al., 2009) and *Lin28b* (Xu et al., 2009; Zhong et al., 2010), respectively. Our results that *Lin28b* overexpression rescues the proliferation defects of T-UCstem1 KD ESCs support the conclusion that a T-UCstem1/miR-9/Tlx1-Lin28b axis controls cell-cycle progression in ESCs.

Besides its pro-proliferative activity, T-UCstem1 also acts as a *brake* for ESC differentiation. Indeed, genome-wide and targeted analysis indicate that, upon T-UCstem1 silencing, FBS/Lif/Feeders ESCs retain expression of key pluripotency factors but concomitantly induce the expression of a large set of developmental genes of the three germ layers (ectoderm, mesoderm, and endoderm). In line with this peculiar molecular signature, FBS/Lif/Feeders T-UCstem1 KD ESCs keep pluripotency features and are able to differentiate *in vitro* and contribute to chimeric embryos *in vivo*. On the other hand, in less-permissive culture conditions (low density without feeders) FBS/Lif T-UCstem1 KD ESCs rapidly exit pluripotency and undergo differentiation, pointing to a key role of T-UCstem1 in preserving ESC self-renewal rather than pluripotency. Of note, since T-UCstem1 expression is not fully abrogated in T-UCstem1 KD ESCs, we cannot rule out the possibility that a complete loss of T-UCstem1 expression could give a more dramatic effect.

The observation that T-UCstem1 KD ESC self-renewal, but not the proliferation defects, were rescued in *2i* culture conditions, suggests different mechanisms of action of T-UCstem1-dependent control of ESC proliferation and self-renewal. Indeed, a large number (~50%) of all the developmental regulatory genes that are upregulated in T-UCstem1 KD ESCs are bivalent domains-associated genes, which are characterized by a distinctive histone modification signature that combines the activating H3K4me3 and the repressive H3K27me3 marks. These bivalent domains are considered to poise expression of developmental genes, allowing timely activation, while maintaining repression in the absence of differentiation signals (Voigt et al., 2013). Increasing evidence indicates that PRC2 plays a crucial role in maintaining the bivalent domains in ESCs (Aranda et al., 2015) by ensuring a proper and robust differentiation.

Withdrawal of PRC2 activity from ESCs results in global gene derepression of bivalent-associated genes (Azuara et al., 2006; Boyer et al., 2006; Lee et al., 2006) and spontaneous differentiation (Boyer et al., 2006; Endoh et al., 2008). PRC2 interacts with many lncRNAs in ESCs (e.g., *HOTAIR*, *Malat1*, and *Gtl2*), and these facilitate its recruitment to chromatin (Zhao et al., 2010). Furthermore, recent findings indicate that non-coding RNAs recruit PRC2 complex to chromatin either in *cis* or in *trans*, thereby causing changes in chromatin composition (Holoach and Moazed, 2015). Our findings indicate that T-UCstem1 is a new player in this complex scenario and provide evidence of a direct involvement of T-UCstem1 in switching the balance of these histone modifications in ESCs. Indeed, we show that T-UCstem1 directly interacts both with PRC2 complex and the bivalent domain-associated genes *Nestin*, *Gata6*, and *Foxa2*, and that this interaction may stabilize/guide PRC2 activity in determining the typical histone modifications at these bivalent domains. Thus, we propose a model wherein PRC2 is displaced in the absence of T-UCstem1, and this results in increased H3K4me3/H3K27me3 ratio on bivalent promoters of differentiation genes, which eventually induces their expression. Notably, we demonstrate that, besides the regulation on bivalent genes localized on different chromosomes (i.e., *Nestin*, *Gata6*, and *Foxa2*), T-UCstem1 also controls the expression of the neighbor bivalent gene *Nr2f1* (Laursen et al., 2013), thus suggesting that the T-UCstem1 tethers PRC2 both in *cis* and in *trans*. Of note, considering the low abundance of T-UCstem1 and the ~400 bivalent genes that are deregulated in the T-UCstem1 KD ESCs, we speculate that they might represent both direct and indirect targets of T-UCstem1.

In summary, we provide unprecedented evidence that a UCE-containing lncRNA is a key regulator of ESCs and get mechanistic insights into the mode of action. Indeed, we propose that T-UCstem1 exerts a dual function in ESCs; specifically, it controls ESC proliferation by regulating miR-9/Lin28b cellular levels in the cytoplasm, and maintains ESC transcriptional dynamics and self-renewal, at least in part through PRC2 stabilization in the nucleus. Overall, our study points to a functional role of T-UCs in ESC biology, and pave the way for a better understanding of the complex molecular machinery controlling ESC pluripotency and lineage specification.

## EXPERIMENTAL PROCEDURES

### T-UCstem1 KD Mouse ESC Generation

Animal experiments were done in accordance with the law on animal experimentation (article 7; D.L. 116/92) under the Animal Protocol approved by the Italian Ministry of Health.

Stable T-UCstem1 KD ESC clones (designated as KD-1 and KD-2) were generated by using custom-designed shRNAs targeting

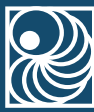

non-overlapping regions of the transcript (different shRNAs were used in order to limit the off-target effects). For this purpose, we used the BLOCK-iT Inducible H1 RNAi Entry Vector Kit (Invitrogen, cat. no. K4920-00 and K4925-00), a Gateway-adapted entry vector for regulated expression of shRNA in mammalian cells, following the manufacturer's instructions. In brief, we designed custom shRNA taking advantage of Invitrogen's RNAi designer and we cloned them into pENTR/H1/TO vector. Next, plasmid constructs that direct shRNA expression were introduced into ESCs (TBV2 (129/SvP)) by electroporation and drug selection (Zeocin). Then, we isolated ESC constitutively expressing shRNAs clones, we propagated them, and the degree of knockdown was assessed by qRT-PCR. Selected ESC clones were used for this study.

In particular, to silence T-UCstem1, we used three different shRNAs reported in [Supplemental Information](#). Moreover, we generated NT ESCs, to use as Control, by transfecting the cells with shRNA targeting LacZ gene and supplied in the kit.

### Whole-Genome Expression Analysis

RNA was extracted from NT and KD ESCs using TRIzol reagent (Thermo Fisher Scientific). To identify the expression profile of T-UCs and miRNAs, the total RNA was hybridized to a custom ncRNA microarray (OSU-CCC 4.0, Ohio State University Comprehensive Cancer Center), which included sense and antisense probes, one corresponding to the sense genomic sequence (+) and the other to the complementary sequence (+A) for all 481 human ultraconserved sequences reported by Bejerano et al. (in total there are probes for 962 possible T-UCs). The GEO describes the OSU-CCC 4.0 platform under accession number GPL14184. T-UCs were retained when present in at least 20% of samples and when at least 20% of them had a fold change of more than 1.0 from the gene median. Absent calls were thresholded prior to normalization and statistical analysis. Normalization was performed using quantiles ([Table S1](#)).

RNA-seq was performed at the Institute for Applied Genomics using the Illumina HiSeq 2500 platform (<http://www.igatechnology.com/>). The data were analyzed by aligning the reads to a reference genome (Mus musculus mm9) using Tophat ([Trapnell et al., 2009](#)), which is also able to align sequences that span exon-exon junctions. Then, we performed a differential expression analysis using Cufflinks ([Trapnell et al., 2010](#)), which is able to calculate transcript abundance and abundance of different gene isoforms. Finally, this analysis showed the most deregulated transcripts when comparing them with the different groups ([Table S2](#)). Actually, in order to avoid clonal effects, we analyzed three independent KD ESC clones generated as described above and the average values were reported. A custom R-script was used to create the plot in [Figure 6A](#).

### T-UCstem1 ChIRP

ChIRP assay was performed using the Magna ChIRPTM RNA Interactome Kits (Millipore) according to the manufacturer's instructions. Biotin-labeled antisense T-UCstem1 DNA probe sequences are reported in [Supplemental Information](#). Isolated DNA was used for qPCR analyses to estimate the site occupancy of T-UCstem1 on the *Nestin*, *Gata6*, and *Foxa2* promoter. The site occupancy was calculated as ratio between the percent input of

each specific target qPCR and the average of the percent input of the internal negative control (*Sox2*). Data are shown as the site occupancy mean.

### ACCESSION NUMBERS

The accession numbers for the ncRNA (T-UCE and miRNAs) expression profile and RNA-seq data are ArrayExpress: E-MTAB-6391 and GEO: GSE108662, respectively.

### SUPPLEMENTAL INFORMATION

Supplemental Information includes Supplemental Experimental Procedures, six figures, and four tables and can be found with this article online at <https://doi.org/10.1016/j.stemcr.2018.01.014>.

### AUTHOR CONTRIBUTIONS

A. Fico and G.M. conceived and designed the study. M.R.M. contributed to the concept and design of the epigenetic study. A. Fiorenzano, E.P., M. Gagliardi, M.R.M., A. Fico, and G.M. planned and designed the experiments and analyzed the data. A. Fiorenzano, E.P., M. Gagliardi, S.T., M.P., G.A., and A. Fico performed the experiments. M. Gagliardi, M. Galasso, G.M.T., and C.T. performed bioinformatics analysis. E.J.P., A.C., and M.R.M. gave conceptual advice and edited the manuscript. G.M. and A. Fico wrote the manuscript. All authors reviewed and approved the manuscript.

### ACKNOWLEDGMENTS

We thank the Mouse Modeling, Integrated Microscopy, and FACS Facilities of IGB-CNR, Naples. Dr. Laura Pisapia is acknowledged for flow cytometry analyses. We are grateful to Prof. Chris Ponting and George A. Calin for insightful scientific discussion. We thank Dr. Monica Autiero for helpful discussion and careful reading of the manuscript. We are indebted to Prof. Malin Parmar and her lab for support with human ESC experiments. Dr Silvia Parisi is acknowledged for providing Lin28 cDNA plasmid and Dr Valeria Tarallo for helpful discussion and experimental support in setting the northern blot conditions. This work is supported by Epigenomics Flagship Project (EPIGEN) MIUR-CNR; TRANSCAN-2 Project BeFIT; the Italian Ministry of Education-University-Research (grant CTN01\_00177); AIRC (IG 20736); and Telethon grant GP15209. Emilia Pascale was supported by a PhD fellowship financed by IGB, CNR.

Received: May 5, 2017

Revised: January 12, 2018

Accepted: January 15, 2018

Published: February 15, 2018

### REFERENCES

- Ahituv, N., Zhu, Y., Visel, A., Holt, A., Afzal, V., Pennacchio, L.A., and Rubin, E.M. (2007). Deletion of ultraconserved elements yields viable mice. *PLoS Biol.* 5, e234.
- Aranda, S., Mas, G., and Di Croce, L. (2015). Regulation of gene transcription by Polycomb proteins. *Sci. Adv.* 1, e1500737.



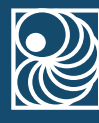

- Azuara, V., Perry, P., Sauer, S., Spivakov, M., Jørgensen, H.F., John, R.M., Gouti, M., Casanova, M., Warnes, G., Merckenschlager, M., et al. (2006). Chromatin signatures of pluripotent cell lines. *Nat. Cell Biol.* 8, 532–538.
- Bejerano, G., Pheasant, M., Makunin, I., Stephen, S., Kent, W.J., Mattick, J.S., and Haussler, D. (2004). Ultraconserved elements in the human genome. *Science* 304, 1321–1325.
- Bernstein, B.E., Mikkelsen, T.S., Xie, X., Kamal, M., Huebert, D.J., Cuff, J., Fry, B., Meissner, A., Wernig, M., Plath, K., et al. (2006). A bivalent chromatin structure marks key developmental genes in embryonic stem cells. *Cell* 125, 315–326.
- Boyer, L.A., Plath, K., Zeitlinger, J., Brambrink, T., Medeiros, L.A., Lee, T.I., Levine, S.S., Wernig, M., Tajonar, A., Ray, M.K., et al. (2006). Polycomb complexes repress developmental regulators in murine embryonic stem cells. *Nature* 441, 349–353.
- Calin, G.A., Liu, C.G., Ferracin, M., Hyslop, T., Spizzo, R., Sevignani, C., Fabbri, M., Cimmino, A., Lee, E.J., Wojcik, S.E., et al. (2007). Ultraconserved regions encoding ncRNAs are altered in human leukemias and carcinomas. *Cancer Cell* 12, 215–229.
- Chalei, V., Sansom, S.N., Kong, L., Lee, S., Montiel, J.F., Vance, K.W., and Ponting, C.P. (2014). The long non-coding RNA Dali is an epigenetic regulator of neural differentiation. *Elife* 3, e04530.
- Coolen, M., Katz, S., and Bally-Cuif, L. (2013). miR-9: a versatile regulator of neurogenesis. *Front. Cell. Neurosci.* 7, 220.
- De Gobbi, M., Garrick, D., Lynch, M., Vernimmen, D., Hughes, J.R., Goardon, N., Luc, S., Lower, K.M., Sloane-Stanley, J.A., Pina, C., et al. (2011). Generation of bivalent chromatin domains during cell fate decisions. *Epigenetics Chromatin* 4, 9.
- Dermitzakis, E.T., Reymond, A., and Antonarakis, S.E. (2005). Conserved non-genic sequences - an unexpected feature of mammalian genomes. *Nat. Rev. Genet.* 6, 151–157.
- Dinger, M.E., Amaral, P.P., Mercer, T.R., Pang, K.C., Bruce, S.J., Gardiner, B.B., Askarian-Amiri, M.E., Ru, K., Soldà, G., Simons, C., et al. (2008). Long noncoding RNAs in mouse embryonic stem cell pluripotency and differentiation. *Genome Res.* 18, 1433–1445.
- Endoh, M., Endo, T.A., Endoh, T., Fujimura, Y., Ohara, O., Toyoda, T., Otte, A.P., Okano, M., Brockdorff, N., Vidal, M., et al. (2008). Polycomb group proteins Ring1A/B are functionally linked to the core transcriptional regulatory circuitry to maintain ES cell identity. *Development* 135, 1513–1524.
- Fabbri, M., Garzon, R., Andreeff, M., Kantarjian, H.M., Garcia-Manero, G., and Calin, G.A. (2008). MicroRNAs and noncoding RNAs in hematological malignancies: molecular, clinical and therapeutic implications. *Leukemia* 22, 1095–1105.
- Fassan, M., Dall'Olmo, L., Galasso, M., Braconi, C., Pizzi, M., Realdon, S., Volinia, S., Valeri, N., Gasparini, P., Baffa, R., et al. (2014). Transcribed ultraconserved noncoding RNAs (T-UCR) are involved in Barrett's esophagus carcinogenesis. *Oncotarget* 5, 7162–7171.
- Feng, J., Bi, C., Clark, B.S., Mady, R., Shah, P., and Kohtz, J.D. (2006). The Evf-2 noncoding RNA is transcribed from the Dlx-5/6 ultraconserved region and functions as a Dlx-2 transcriptional coactivator. *Genes Dev.* 20, 1470–1484.
- Fico, A., Manganelli, G., Simeone, M., Guido, S., Minchiotti, G., and Filosa, S. (2008). High-throughput screening-compatible single-step protocol to differentiate embryonic stem cells in neurons. *Stem Cells Dev.* 17, 573–584.
- Galasso, M., Dama, P., Previati, M., Sandhu, S., Palatini, J., Coppola, V., Warner, S., Sana, M.E., Zanella, R., Abujarour, R., et al. (2014). A large scale expression study associates uc.283-plus lncRNA with pluripotent stem cells and human glioma. *Genome Med.* 6, 76.
- Guan, D., Zhang, W., Zhang, W., Liu, G.H., and Belmonte, J.C. (2013). Switching cell fate, ncRNAs coming to play. *Cell Death Dis.* 4, e464.
- Guo, G., Yang, J., Nichols, J., Hall, J.S., Eyres, I., Mansfield, W., and Smith, A. (2009). Klf4 reverts developmentally programmed restriction of ground state pluripotency. *Development* 136, 1063–1069.
- Holoch, D., and Moazed, D. (2015). RNA-mediated epigenetic regulation of gene expression. *Nat. Rev. Genet.* 16, 71–84.
- Katzman, S., Kern, A.D., Bejerano, G., Fewell, G., Fulton, L., Wilson, R.K., Salama, S.R., and Haussler, D. (2007). Human genome ultraconserved elements are ultraselected. *Science* 317, 915.
- Laursen, K.B., Mongan, N.P., Zhuang, Y., Ng, M.M., Benoit, Y.D., and Gudas, L.J. (2013). Polycomb recruitment attenuates retinoic acid-induced transcription of the bivalent NR2F1 gene. *Nucleic Acids Res.* 41, 6430–6443.
- Lee, T.I., Jenner, R.G., Boyer, L.A., Guenther, M.G., Levine, S.S., Kumar, R.M., Chevalier, B., Johnstone, S.E., Cole, M.F., Isono, K., et al. (2006). Control of developmental regulators by Polycomb in human embryonic stem cells. *Cell* 125, 301–313.
- Liz, J., Portela, A., Soler, M., Gomez, A., Ling, H., Michlewski, G., Calin, G.A., Guil, S., and Esteller, M. (2014). Regulation of pri-miRNA processing by a long noncoding RNA transcribed from an ultraconserved region. *Mol. Cell* 55, 138–147.
- Loewer, S., Cabili, M.N., Guttman, M., Loh, Y.H., Thomas, K., Park, I.H., Garber, M., Curran, M., Onder, T., Agarwal, S., et al. (2010). Large intergenic non-coding RNA-RoR modulates reprogramming of human induced pluripotent stem cells. *Nat. Genet.* 42, 1113–1117.
- Lujambio, A., Portela, A., Liz, J., Melo, S.A., Rossi, S., Spizzo, R., Croce, C.M., Calin, G.A., and Esteller, M. (2010). CpG island hypermethylation-associated silencing of non-coding RNAs transcribed from ultraconserved regions in human cancer. *Oncogene* 29, 6390–6401.
- Margueron, R., and Reinberg, D. (2011). The Polycomb complex PRC2 and its mark in life. *Nature* 469, 343–349.
- Mattick, J.S., and Makunin, I.V. (2005). Small regulatory RNAs in mammals. *Hum. Mol. Genet.* 14 Spec No 1, R121–R132.
- Ng, S.Y., Johnson, R., and Stanton, L.W. (2012). Human long non-coding RNAs promote pluripotency and neuronal differentiation by association with chromatin modifiers and transcription factors. *EMBO J.* 31, 522–533.
- Ng, S.Y., and Stanton, L.W. (2013). Long non-coding RNAs in stem cell pluripotency. *Wiley Interdiscip. Rev. RNA* 4, 121–128.
- Ni, J.Z., Grate, L., Donohue, J.P., Preston, C., Nobida, N., O'Brien, G., Shiue, L., Clark, T.A., Blume, J.E., and Ares, M., Jr. (2007). Ultraconserved elements are associated with homeostatic control of

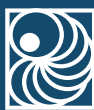

- splicing regulators by alternative splicing and nonsense-mediated decay. *Genes Dev.* **21**, 708–718.
- Nobrega, M.A., Zhu, Y., Plajzer-Frick, I., Afzal, V., and Rubin, E.M. (2004). Megabase deletions of gene deserts result in viable mice. *Nature* **431**, 988–993.
- Olivieri, M., Ferro, M., Terreri, S., Durso, M., Romanelli, A., Avitabile, C., De Cobelli, O., Messere, A., Bruzzese, D., Vannini, I., et al. (2016). Long non-coding RNA containing ultraconserved genomic region 8 promotes bladder cancer tumorigenesis. *Oncotarget* **7**, 20636–20654.
- Paling, N.R., Wheadon, H., Bone, H.K., and Welham, M.J. (2004). Regulation of embryonic stem cell self-renewal by phosphoinositide 3-kinase-dependent signaling. *J. Biol. Chem.* **279**, 48063–48070.
- Papavidis, Z., Abbasi, A.A., Malik, S., Goode, D.K., Callaway, H., Elgar, G., deGraaff, E., Lopez-Rios, J., Zeller, R., and Grzeschik, K.H. (2007). Ultraconserved non-coding sequence element controls a subset of spatiotemporal *GLI3* expression. *Dev. Growth Differ.* **49**, 543–553.
- Pennacchio, L.A., Ahituv, N., Moses, A.M., Prabhakar, S., Nobrega, M.A., Shoukry, M., Minovitsky, S., Dubchak, I., Holt, A., Lewis, K.D., et al. (2006). In vivo enhancer analysis of human conserved non-coding sequences. *Nature* **444**, 499–502.
- Qu, Q., Sun, G., Li, W., Yang, S., Ye, P., Zhao, C., Yu, R.T., Gage, F.H., Evans, R.M., and Shi, Y. (2010). Orphan nuclear receptor TLX activates Wnt/beta-catenin signalling to stimulate neural stem cell proliferation and self-renewal. *Nat. Cell Biol.* **12**, 31–40, sup pp 31–39.
- Ramírez, M.Á., Pericuesta, E., Yáñez-Mó, M., Palasz, A., and Gutiérrez-Adán, A. (2011). Effect of long-term culture of mouse embryonic stem cells under low oxygen concentration as well as on glycosaminoglycan hyaluronan on cell proliferation and differentiation. *Cell Prolif.* **44**, 75–85.
- Rehmsmeier, M., Steffen, P., Hochsmann, M., and Giegerich, R. (2004). Fast and effective prediction of microRNA/target duplexes. *RNA* **10**, 1507–1517.
- Rinn, J.L., Kertesz, M., Wang, J.K., Squazzo, S.L., Xu, X., Brugmann, S.A., Goodnough, L.H., Helms, J.A., Farnham, P.J., Segal, E., et al. (2007). Functional demarcation of active and silent chromatin domains in human HOX loci by noncoding RNAs. *Cell* **129**, 1311–1323.
- Trapnell, C., Pachter, L., and Salzberg, S.L. (2009). TopHat: discovering splice junctions with RNA-Seq. *Bioinformatics* **25**, 1105–1111.
- Trapnell, C., Williams, B.A., Pertea, G., Mortazavi, A., Kwan, G., van Baren, M.J., Salzberg, S.L., Wold, B.J., and Pachter, L. (2010). Transcript assembly and quantification by RNA-Seq reveals unannotated transcripts and isoform switching during cell differentiation. *Nat. Biotechnol.* **28**, 511–515.
- Voigt, P., Tee, W.W., and Reinberg, D. (2013). A double take on bivalent promoters. *Genes Dev.* **27**, 1318–1338.
- Wang, Y., Xu, Z., Jiang, J., Xu, C., Kang, J., Xiao, L., Wu, M., Xiong, J., Guo, X., and Liu, H. (2013). Endogenous miRNA sponge lincRNA-RoR regulates Oct4, Nanog, and Sox2 in human embryonic stem cell self-renewal. *Dev. Cell* **25**, 69–80.
- Xu, B., Zhang, K., and Huang, Y. (2009). Lin28 modulates cell growth and associates with a subset of cell cycle regulator mRNAs in mouse embryonic stem cells. *RNA* **15**, 357–361.
- Zhao, C., Sun, G., Li, S., and Shi, Y. (2009). A feedback regulatory loop involving microRNA-9 and nuclear receptor TLX in neural stem cell fate determination. *Nat. Struct. Mol. Biol.* **16**, 365–371.
- Zhao, J., Ohsumi, T.K., Kung, J.T., Ogawa, Y., Grau, D.J., Sarma, K., Song, J.J., Kingston, R.E., Borowsky, M., and Lee, J.T. (2010). Genome-wide identification of polycomb-associated RNAs by RIP-seq. *Mol. Cell* **40**, 939–953.
- Zhong, X., Li, N., Liang, S., Huang, Q., Coukos, G., and Zhang, L. (2010). Identification of microRNAs regulating reprogramming factor LIN28 in embryonic stem cells and cancer cells. *J. Biol. Chem.* **285**, 41961–41971.

**Stem Cell Reports, Volume 10**

**Supplemental Information**

**An Ultraconserved Element Containing lncRNA Preserves Transcriptional Dynamics and Maintains ESC Self-Renewal**

**Alessandro Fiorenzano, Emilia Pascale, Miriam Gagliardi, Sara Terreri, Mariarosaria Papa, Gennaro Andolfi, Marco Galasso, Guidantonio Malagoli Tagliazucchi, Cristian Taccioli, Eduardo Jorge Patriarca, Amelia Cimmino, Maria Rosaria Matarazzo, Gabriella Minchiotti, and Annalisa Fico**



# SUPPLEMENTAL INFORMATION

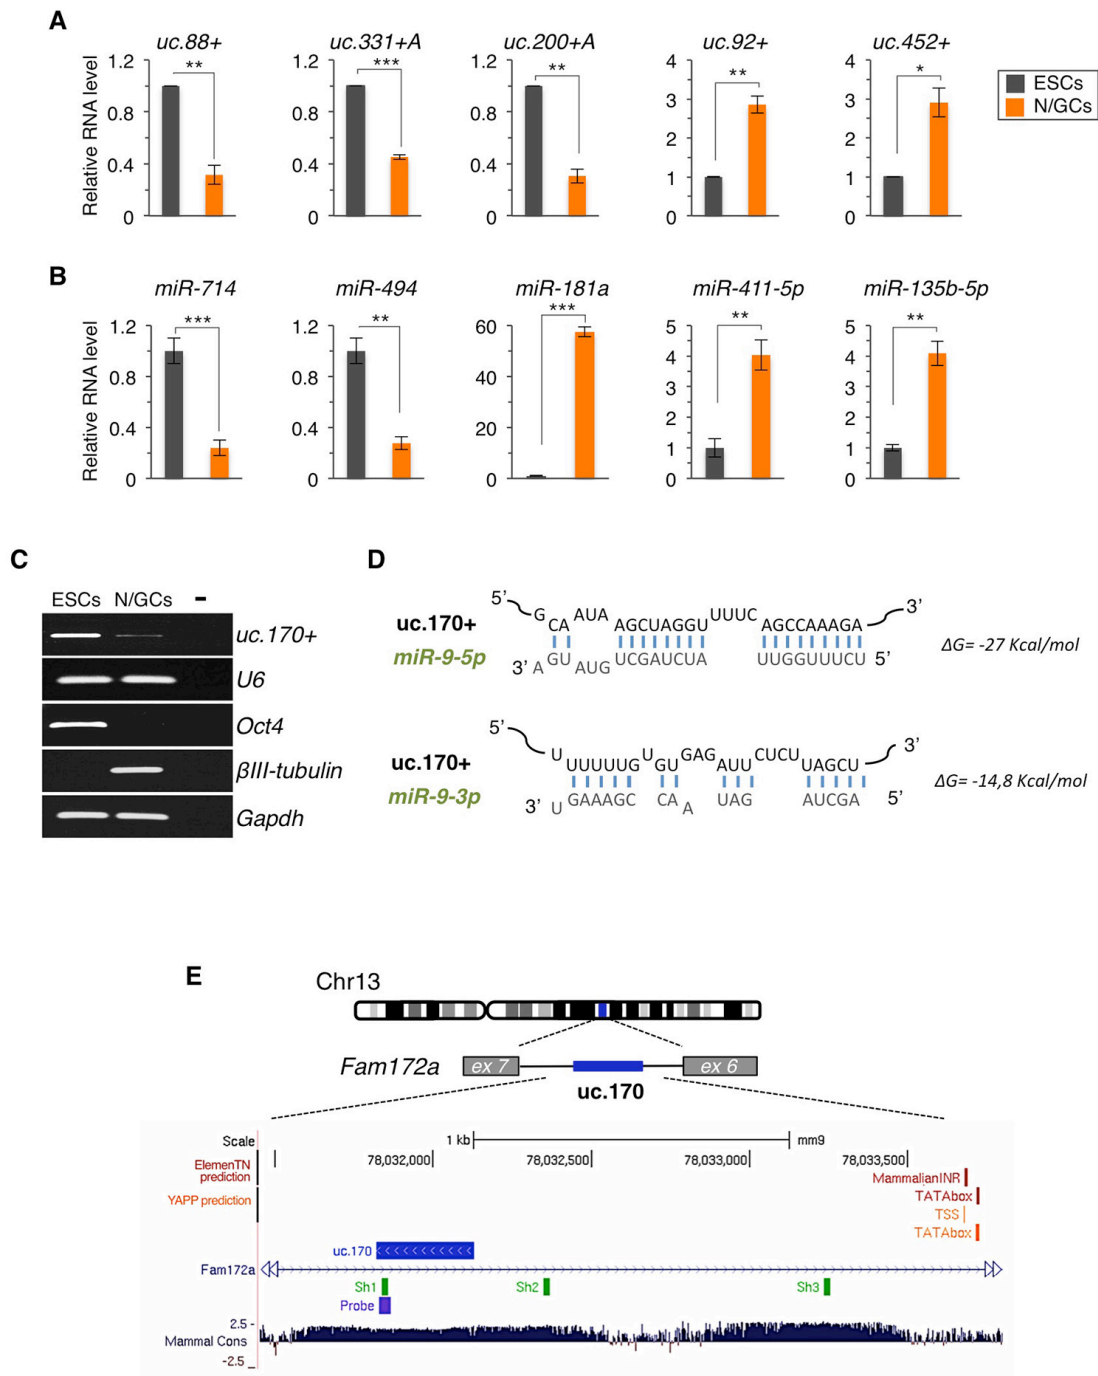

Supplementary Figure 1

**B** Chr13: 78031716-78033528, strand - (1813bp)

5'GAGTACGGGAGGGGGCTGTATGCCATCCAAGTTCTGATGTGACATAATATTAAGATAGT  
 TGTCTATGGAAGGGAAGGGTTAATGGGGATTTTAACTAATGAACCCAGTGACACAGGCTC  
 TGAAGTAAGCCCTGCATAGTTCTAAGCCAACCTTAGAATTTCAACCCCTCCAGCCCTGGCTTAG  
 ATCATACAGGCTCTACTAGAAATGTCAAGAATGTGAAGAGGCGTCTTTAGCCAAAAGGACAC  
 AACTTAAGTACATAATGCTAGCTTACTGTTTCGTTTATCCCTCTTCATTAGTGAGAAAAT  
 GGACTCTCGTAAATGCTTGTAAAAATCCCTACCTACACTCCTCGTTAATGTGAGTGATCCAT  
 TTGTGTTCAATTTCTGCTGACAACGCTTACTGGAAGATTAATGCCCCATGTCAAAGTGTAGCA  
 ACCCTCGTCCCCTTCTATTTCTTTCTCTCTGCTGTTGAAGTAATAATGGACCTGTCTTTTGT  
 TTTAAGACTGGGATTAGGAGAGAGTGAGTTTTTCTCGGACGACTTTACGGAGTAGAGTTTGG  
 TTGAATACTTATAAGATTCCCATGGAAAGGAAGCACATAGTCCTTTGCTACTGTTTACTTC  
 ACACATCTTGCCATCTTTGTTAGCCTTATCCCTATATGATTCTGGTCTAAGTAAATCTACATG  
 CACCCTATACATACATGTCATTTTCTGTTCTCATACCTGGGGACTTCAAATTTGGCACTGATAAT  
 TGTCCTTTCTACAAGCACATATCCCTTGCAAACATATTTTCAGTTCTGTGCATAAATGGA  
 GTCTTAAGTAGAATCAAACACTATAGAAAGACCATCTTTCAGGTTCTAAAATTTTATAAAAACA  
 AAATAAAACAAAACAAAACACTCAACAATAGCATAAAAATCATAACGGCAGCAACGATATTTAAA  
 AAAAAATACCCTCGTTGCTTATTGAAATAAGCAAAAAGATATCACCAAAATATAAATTTCCAATT  
 CTCATTTTGCATTTTTTTCAGGAACATTAAGAGTTTTATGTTATCACAAAACCTCAGAAACTAC  
 CAAGCCGAAAAGGAGGCTTATTAGAGTAGCCGGCAGTATCTCATTAAATCTCTCAATTTGCT  
 GATCGTCCACAGCAGACCTCCAAGAGACTTGATATTATACTCATTGCAATTAACCAAACAAAA  
 GATTTAAACCGCCAGAGCATTGGGAAATGTTTGGTTGGGGCTGAAGAAGTGAATGATATT  
 CCAGGGCTGGCCAGATGTACAAGGGGTGATATGCATGTGCTCACTTCACTCGCAGCTTTGTG  
 CAGGACCTGTCTATTTACAGCACTACAGCTAAGCACTCTGAAGGCTATTCACTGAGGAGTCC  
 TTTCAGAAAGTGCTGAAGCACCCCTTAAGCCCACTTAACCTACCTTTTCACACACTCTCCAG  
 CTCTCTTTTTGTCCTTGCTTACATTACATCAAACACAGGAACAAAGCAAGAGAACAGAAAC  
 TCAGAGGCAGAGAATAGACCCATCACAATATTAATTTGAAAAGGTGTTGAAGTGAGAAT  
 CTGCTTTTATGCACAAGGACAACCTTGCATTTTTTGTGTGAGATTCTCTAGCTGCAATAAGCT  
 AGGTTTTAGCCAAAGAGAGGCAAGACTCAAAGTGCAATTATACACAGGGAAGCTGCTTTA  
 AATCAAACAATGCTCCGAAGCTTTAGATCTATAGTGATAAAGACTTGGCAAGCACTGTTAA  
 ATAGAAGCCCTATATGAGATGCAGAGTTCAGTCTATGGA 3'

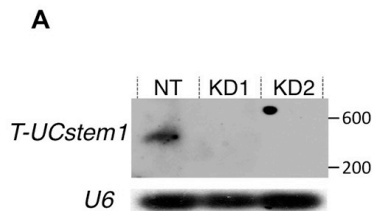

**C**

T-UCstem1  
 MEF secondary structure  
 Free energy: -459.48 kcal/mol

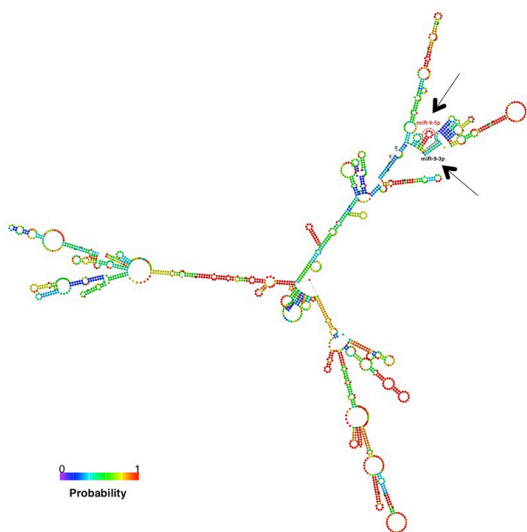

T-UCstem1  
 Centroid secondary structure  
 Free energy: -253.30 kcal/mol

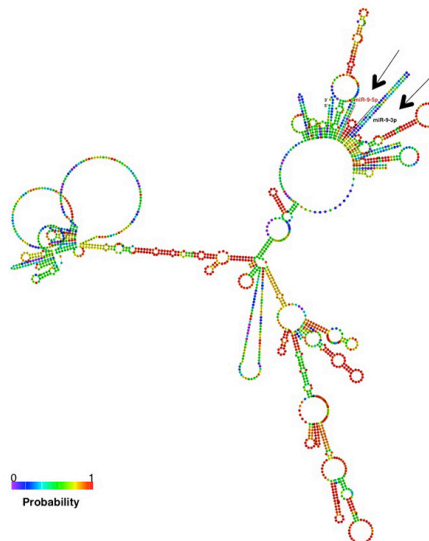

Supplementary Figure 2

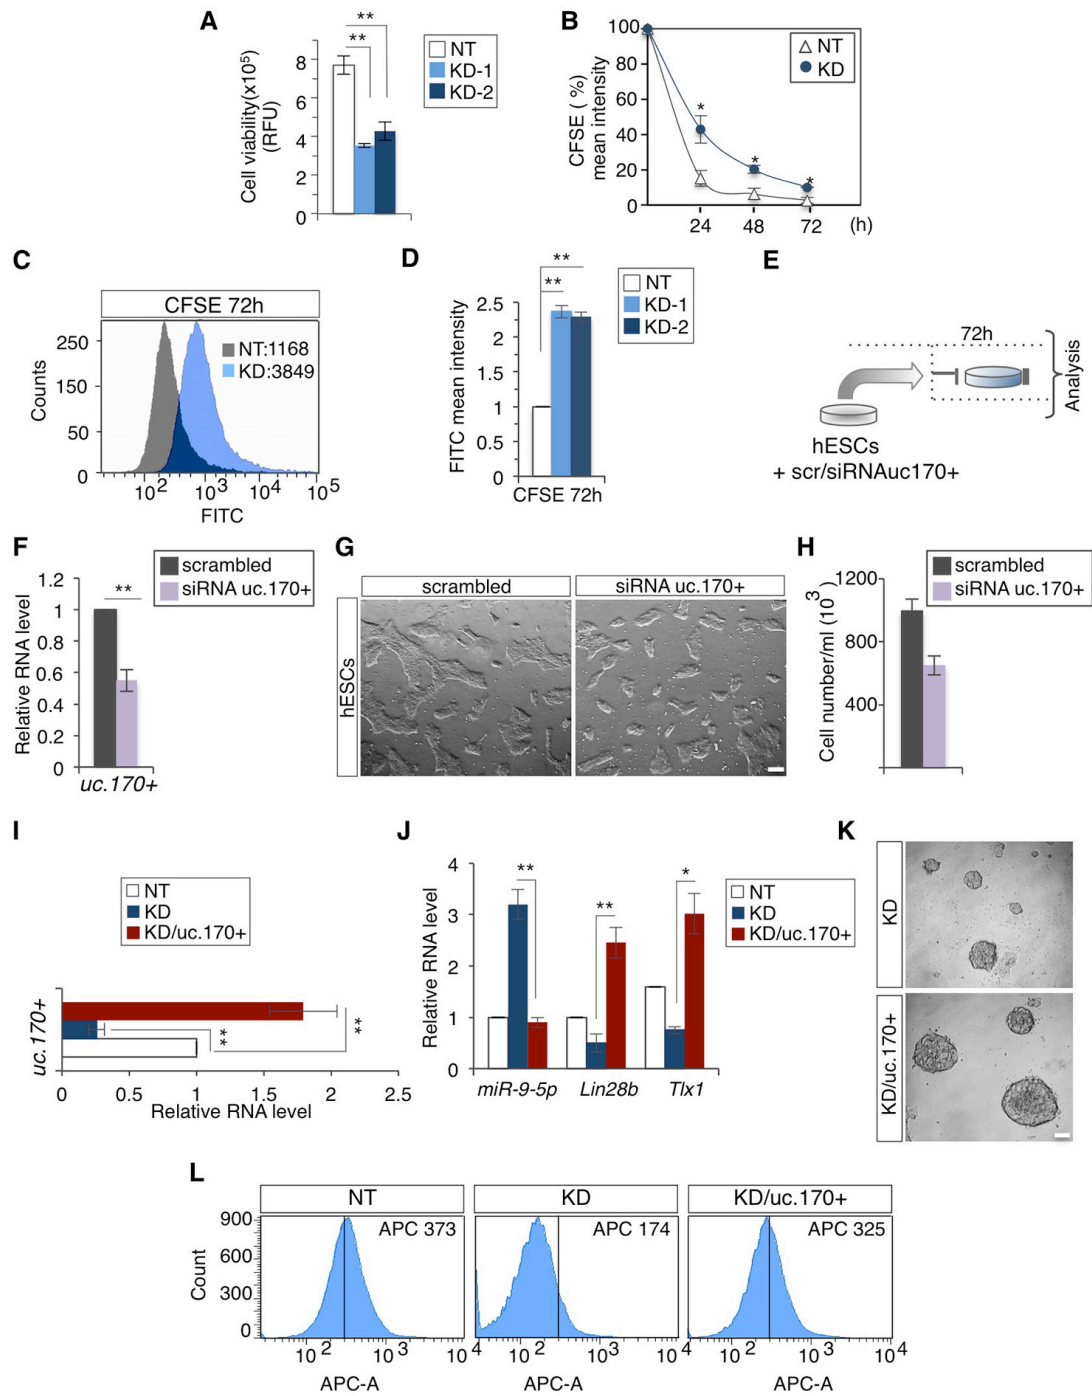

Supplementary Figure 3



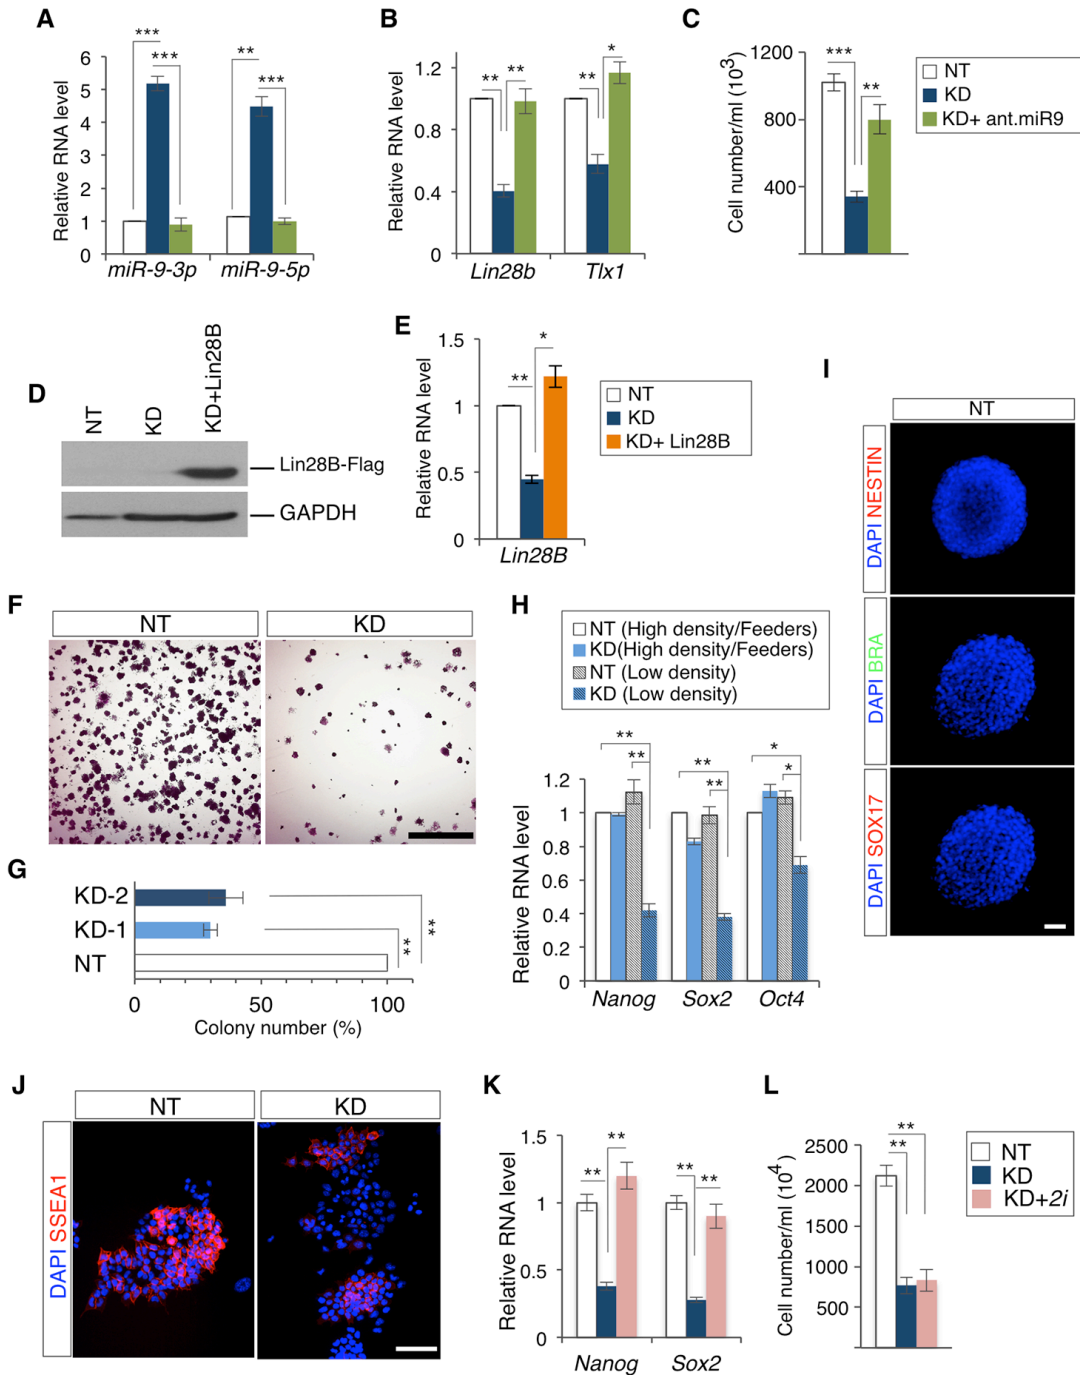

Supplementary Figure 4

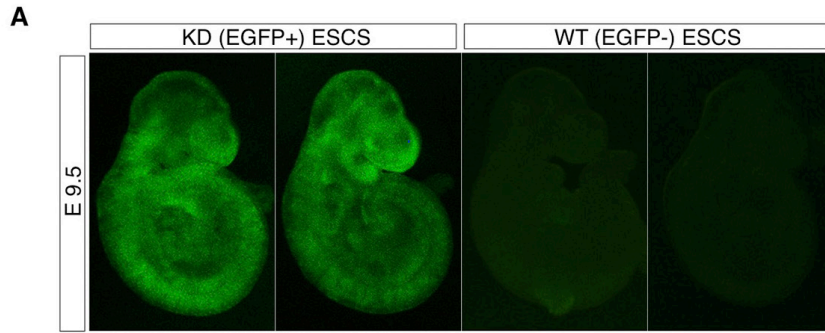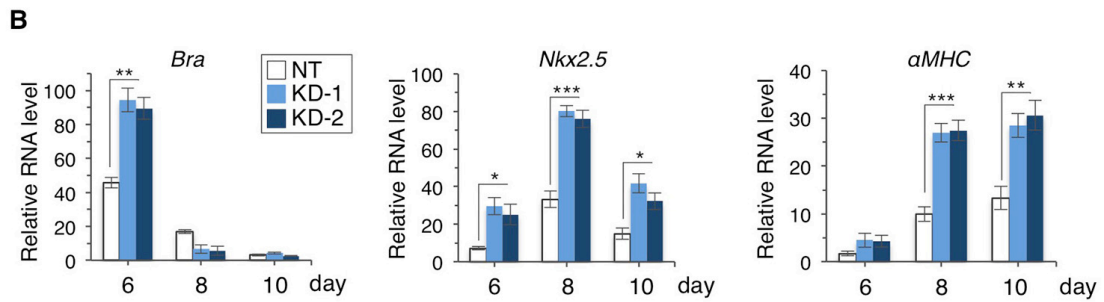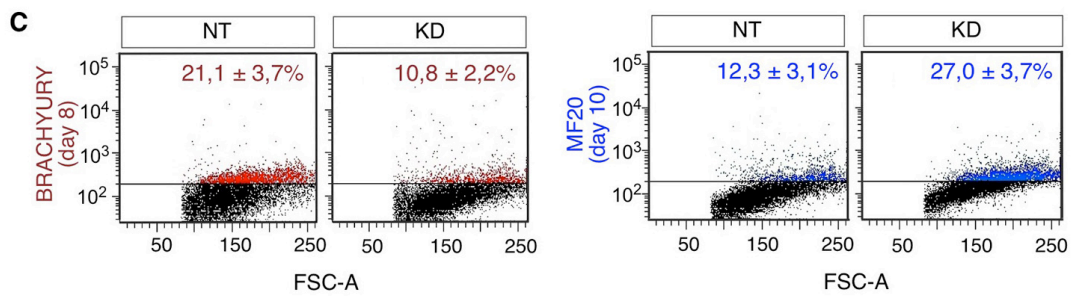

Supplementary Figure 5

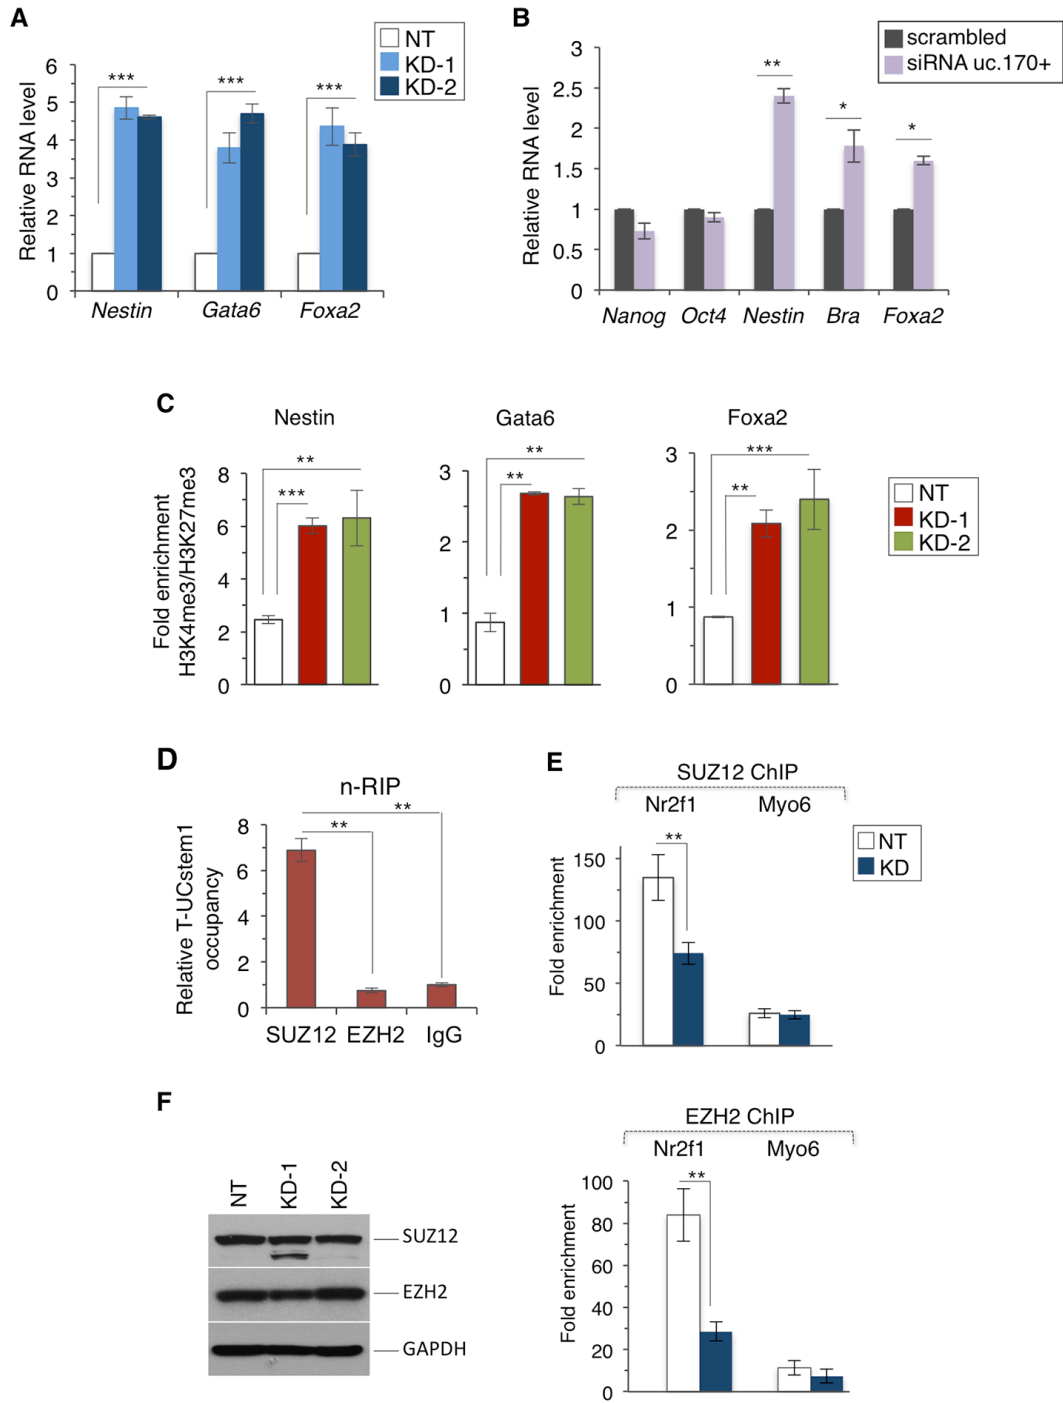

Supplementary Figure 6

**Table S3. Primers sets used in this study.**

| <b>GENE NAME</b>                     | <b>FORWARD PRIMER</b>              | <b>REVERSE PRIMER</b>              |
|--------------------------------------|------------------------------------|------------------------------------|
| <b>T-UCstem1</b>                     | TGAGTCTTTGCCTCTCTTTGG              | AAGTGCTGAAGCACCCCTTA               |
| <b>Gapdh</b>                         | TGGGGGAACTTAAAGTGCAG               | GATGTAGGCAGCTGTCATTC               |
| <b>Fam172a</b>                       | TGAAAAAGGACGAACCACCT               | TCGCCCAGAGCTTCATATCT               |
| <b>Nanog</b>                         | AAGTACCTCAGCCTCCAGCA               | GTGCTGAGCCCTTCTGAATC               |
| <b>Nr2f1</b>                         | ATCCGCATCTTTCAGGAACA               | TGATTTCTCCTGCAGGCTTT               |
| <b>Oct3/4</b>                        | TCAGCTTGGGCTAGAGAAGG               | TGACGGGAACAGAGGGAAAG               |
| <b>Sox1</b>                          | GCAGCTATCAACCAGATCC                | GATGTAGGCAGCTGTCATTC               |
| <b>Brachyury</b>                     | GAACCTCGGATTCACATCGT               | TTCTTTGGCATCAAGGAAGG               |
| <b>Hes1</b>                          | TGAAGGATTCCAAAAATAAAA<br>TTCTCTGGG | CGCCTCTTCTCCATGATAGGC<br>TTTGATGAC |
| <b>Tlx1</b>                          | GGTCACCCCTATCAGAACCG               | TTTTACTTGCGCATCGGTCA               |
| <b>Sox17</b>                         | AGCTAAGCAAGATGCTAGGC<br>AAG        | TCTCTGCCAAGGTCAACGC                |
| <b>Foxa2</b>                         | ACCTGAGTCCGAGTCTGAGC               | TGTAGCTGCGTCCGGTATGTC              |
| <b>Gata6</b>                         | GCCAACTGTCACACCACAAC               | GGTTTTCGTTTCCTGGTTTG               |
| <b>Nkx2.5</b>                        | CAGTGGAGCTGGACAAAGCC               | TAGCGACGGTTGTGGAACCA               |
| <b><math>\alpha</math>MHC</b>        | TGAAAACGGAAAGACGGTGA               | TCCTTGAGGTTGTACAGCACA              |
| <b>Nestin</b>                        | AGGAGAGAACCACGACCCAC               | GCTGCTGGGTCTCTTGTTTCG              |
| <b><math>\beta</math>III Tubulin</b> | CATGGACAGTGTTCCGGTCTG              | TGCAGGCAGTCACAATTCTC               |
| <b>Sox2</b>                          | CACAACTCGGAGATCAGCAA               | CTCCGGGAAGCGTGTACTTA               |
| <b>Lin28</b>                         | TGGGGGAACTTAAAGTGCAG               | AAGATGGCTCAAACCACACC               |
| <b>Pou5f2</b>                        | TGGGAGCTATGTTTGGGAAG               | CTGCATATGCCCAGAAGGTT               |
| <b>Uc.88+</b>                        | GGAAGCAGAAGTCGGGAAG<br>A           | GAGGGCTGATTAGCATGCAG               |



|                                |                              |                        |
|--------------------------------|------------------------------|------------------------|
| <b>Uc.331+A</b>                | CACTACAGCTCTCTGTGCTTT<br>TAC | CTTACG TTCAGGATCACTGG  |
| <b>Uc.200+A</b>                | CTGGGTTAAATGCTTGTTGC<br>C    | ACAGCTCTGTGAAGGCAGTC   |
| <b>Uc.92+</b>                  | GAGTGGAGAGACAGCTCCTA         | GGGAAATGACTGCTAGACTA   |
| <b>Uc.452+</b>                 | CCAGAGCAAGTACTTGCAAG         | CCATCCATCTTGGGGGCTCA   |
| <b>Gata6 promoter</b>          | ACTTTTTCTGGAGCTCGCGT         | GTTCCGCACGTGGAAATAGC   |
| <b>Nestin promoter</b>         | GGTGCCTGACTACCAGGAG          | TGCACCTCTAAGCGACTCTC   |
| <b>Foxa2 promoter</b>          | CCTGGAGAGACCCGTTTAGC         | CCACCTACTGCCCTGTTTGT   |
| <b>Myo6 promoter</b>           | GCTCCGTAGCAGTGACGTG          | GAGCACCGGAGACGACAG     |
| <b>Nr2f1 promoter</b>          | TGGGAGAGTCGAGCAGGATC         | AGCGCTGCCTTCCTGAATG    |
| <b>T-UCstem1 genomic locus</b> | ACCCAGTGACATCATGTTTTG        | CTTCCCACAATGACCTATGTCA |
| <b>T-UCstem1 (RIP)</b>         | AATCGTCCACAGCAGACCTC         | AGGAGAGCTGGGAGAGTGTG   |

**Table S4. Antibodies used in this study, related to Figure 3, 4, 5 and 6.**

| <b>ANTIBODY</b>                       | <b>SOURCE</b>   | <b>CAT. NO.</b> | <b>APPLICATION</b>                   |
|---------------------------------------|-----------------|-----------------|--------------------------------------|
| <b>Nanog</b>                          | Cell Signaling  | 8822            | IF (1:400) WB (1:1000)               |
| <b>Oct4</b>                           | Santa Cruz B.T. | sc-8628         | IF (1:400)                           |
| <b>Brachyury</b>                      | Santa Cruz B.T. | sc-17745        | IF (1:200) WB (1:1000)               |
| <b>Sox17</b>                          | Santa Cruz B.T. | sc-17318        | IF (1:200)                           |
| <b>PARP</b>                           | Cell Signaling  | 9542            | WB (1:1000)                          |
| <b>Nestin</b>                         | Santa Cruz B.T. | sc-33677        | IHC (1:400) IF (1:500) FACS (1:500)  |
| <b>MF20</b>                           | DSHB            | 2147781         | FACS (1:50)                          |
| <b>Sox2</b>                           | Cell Signaling  | 14962           | IF (1:200) WB (1:500)                |
| <b><math>\beta</math>III-tubulin</b>  | Sigma-Aldrich   | T4026           | FACS (1:500) IF (1:1000)             |
| <b>GFAP</b>                           | Dako            | IS524           | FACS (1:500) IF (1:1000)             |
| <b>SSEA1</b>                          | Cell Signaling  | 4744            | IF (1:1000)                          |
| <b>Caspase9</b>                       | Cell Signaling  | 9508            | WB (1:1000)                          |
| <b>p27</b>                            | Santa Cruz B.T. | (C-19)          | WB (1:400)                           |
| <b>p21</b>                            | Santa Cruz B.T. | sc - 397        | WB (1:400)                           |
| <b>Ezh2</b>                           | Active Motif    | 39875           | ChIP & RIP (5 $\mu$ g)               |
| <b>Ezh2</b>                           | BD Biosciences  | 612666          | WB (1:2000)                          |
| <b>Suz12</b>                          | Active Motif    | 39357           | ChIP & RIP (5 $\mu$ g)<br>WB (1:300) |
| <b>H3K4me3</b>                        | Abcam           | Ab8580          | ChIP (5 $\mu$ g)                     |
| <b>H3K27me3</b>                       | Abcam           | mab ab6002      | ChIP (5 $\mu$ g)                     |
| <b>IgG</b>                            | Millipore       | 12-370          | ChIP & RIP (5 $\mu$ g)               |
| <b><math>\alpha</math>-Flag Lin28</b> | homemade        |                 | WB (1:2000)                          |

## SUPPLEMENTAL EXPERIMENTAL PROCEDURES

### ESC culture and differentiation

NT and T-UCstem1 KD ESCs were cultured in serum/LIF/Feeders, as previously described (Bedzhov et al., 2014). 2i/LIF comprises the Mek inhibitor PD0325901 (Selleckchem.com, 1  $\mu$ M), the Gsk3 inhibitor CHIR99021 (Selleckchem.com, 3  $\mu$ M), and leukemia inhibitory factor (Lif, Millipore 100 U/ml) in F12/Neurobasal medium (Guo et al., 2009). The serum-free mono-step neural differentiation protocol was previously described (Fico et al., 2008). Briefly, cells were seeded at  $1.5 \times 10^3$  cells/cm<sup>2</sup> in knockout D-MEM (Gibco) supplemented with 15% knockout serum replacement (Gibco), 0.1 mM  $\beta$ -mercaptoethanol (Sigma-Aldrich), 2 mM glutamine, and 100 U/ml penicillin/streptomycin (Gibco) and grown for up to 12 days. At the indicated time points, cells were either fixed for immunofluorescence analysis or collected for RNA extraction. For *in vitro* differentiation towards cardiomyocytes, ESCs were cultivated in embryoid bodies (EBs) as previously described (D'Aniello et al., 2013). ESCs were allowed to differentiate through EBs in hanging drop (300 cells/drop) placed on the lids of tissue culture dishes for 2 days without the addition of growth factors. After further 3 days of culture in suspension, 5-day-old EBs were plated on gelatin-coated plates for further analysis.

### T-UCstem1 shRNA sequences

In particular, to silence T-UCstem1, we used three different shRNA reported below:

Sh1 5'-caccGCAAAGACTCAAAGTGCAATTcgaaAATTGCACTTTGAGTCTTTGC-3'

Sh2 5'-caccGCAGACCTCCAAGAGACTTGTcgaaACAAGTCTCTTGGAGGTCTGC-3'

Sh3 5'-caccGCTTACACTGGTTCGTTTATTcgaaAATAAACGAACCAGTGTAAGC-3'

Among the KD ESC clones obtained, we used KD-1 and KD-2 clones, derived by using Sh1 and Sh2 respectively.

### ***In silico* prediction alignment in ultraconserved RNA sequences base pairing with miRNAs**

The target prediction tools *miRBase* (Kozomara and Griffiths-Jones, 2014) and *RNAhybrid* (version 2.1, Bielefeld University) were used to identify putative miRNA target sites in T-UCE sequences described by Bejerano *et al.* (Bejerano *et al.*, 2004). T-UCE::miRNA duplex formation was evaluated under highly stringent conditions using  $p\text{value} < 0.05$  and  $\Delta G < -12$  Kcal/mol.

### ***In silico* prediction of T-UCstem1 promoter and secondary structure**

We used two independent promoter prediction tools: 1) Element (Sloutskin *et al.*, 2015), reporting a TATA box at 1595bp (TATAAAA PWM score 1.00) and an Inr (score 0.0279) at 41bp downstream the TATA box (1,554bp upstream uc.170+); and 2) Eukaryotic Core Promoter Predictor (YAPP; <http://www.bioinformatics.org/yapp/cgi-bin/yapp.cgi>), reporting a TATA box at 1595bp (ATTATAAAAATG score 0.96) and a TSS at 35bp downstream to TATA box (1,554bp upstream uc.170+). Default parameters were used for the above mentioned prediction tools.

For the T-UCstem1 secondary structure prediction Minimum Energy Free (MEF) and Centroid algorithms (available in the RNAfold suite) were used with the default parameters (Gruber *et al.*, 2008).

### **Colony Formation Assay**

Colony-formation assay was performed as previously described (Chambers *et al.*, 2007). Briefly, ESCs were trypsinized to obtain a single cell suspension and plated at low density (100 cells/cm<sup>2</sup>). After 6 days, colonies were fixed in 4% paraformaldehyde (PFA) and stained with crystal violet and alkaline phosphatase as previously described (D'Aniello *et al.*, 2015). Images were collected on a DMI6000B



microscope (Leica Microsystems). The morphological classification (domed/flat) was performed blinded by two investigators.

### **hESC Culture and Differentiation**

The human Embryonic Stem Cell (hESC) line H9 (WiCell, cat. no. hPSCreg WAe009-A) and RC17 (Roslin Cells, cat. no. hPSCreg RCe021-A) were used in this study and were kindly provided by Prof. Malin Parmar (Wallenberg Neuroscience Center, Lund University, Sweden). Undifferentiated hESCs were maintained in culture on Lam-521 (100 µg/ml; Biolamina, cat. no. LN-521) in iPS-Brew XF (StemMACS; Miltenyi, cat. no. 130-104-368) and passaged with EDTA (0.5 M, pH 8.0; Thermo Fisher Scientific, cat.no 15575020) ((Kirkeby et al., 2017)). H9 and RC17 cell lines were differentiated toward human ventral midbrain dopaminergic neurons progenitors according to Nolbrant et al ((Nolbrant et al., 2017). Briefly, the hESCs were seeded to a concentration 10,000 cells per cm<sup>2</sup>, in DMEM/F12:Neurobasal (1:1), N2 supplement (1:100; Thermo Fisher Scientific, cat. no. A1370701) onto plastic-ware coated with Lam111 (100 µg/ml; Biolamina, cat. no. LN-111). Patterning factors SB431542 (10 µM; Miltenyi, cat. no. 130-106-543), Noggin (100 ng/ml; Miltenyi, cat. no. 130-103-456), Shh-C24II (300 ng/ml; Miltenyi, cat. no. 130-095-727) and CHIR99021 (Miltenyi, cat. no. 130-106-539) were also present in the medium from day 0 to day 8. From day 9 of differentiation, FGF8b (100ng/ml; Miltenyi, cat. no. 130-095-740) was added to the medium and on day 11, cells were re-plated at 800.000 cells per cm<sup>2</sup> in DMEM/Neurobasal, B27 supplement (1:100; Thermo Fisher Scientific, cat. no. 12587010). Patterning factors BDNF (20ng/ml, Miltenyi, cat. no. 130-096-286), AA (0,2mM, Sigma-Aldrich, cat. no. A4403-100MG) FGF8 (100ng/ml) were added. For terminal differentiation, the cells were re-plated at day 16 to a concentration 155,000 cells per cm<sup>2</sup> in DMEM/Neurobasal with B27 supplement with BDNF (20ng/ml), AA (0,2mM) GDNF (10ng/ml, R&D Systems, cat. no. 212-GD-010) db-cAMP (500uM Sigma-Aldrich, cat. no. D0627-1G) and DAPT (1uM, *N*-[(3,5-difluorophenyl)acetyl]-l-alanyl-2-phenylglycine-1, 1-dimethylethyl

ester; R&D Systems, cat. no. 2634). The experiments on hESCs were performed in the laboratory of Prof Malin Parmer at the Department of Experimental Medical Science and Lund Stem Cell Center BMC, Lund University, 22632 Lund, Sweden.

### **Cloning and Site-Directed Mutagenesis**

After WT cloning, QuikChange site-directed mutagenesis kit (Stratagene, La Jolla, CA) was used to generate the deletion of 4bp from the site of complementarity between uc.170+ and both miR9-5p and miR9-3p, by PCR using the WT psiCHECK+uc.170+ construct as the template. The following primers containing the deletion were designed and used for site-directed mutagenesis according to the manufacturer's protocol:

miR9-5p Fw 5'-GCTGCAATAAGCTAGGTTTTCAAAGAGAGGCAAAGACTC-3,

miR9-5p Rv 5'-GAGTCTTTGCCTCTCTTTGAAAACCTAGCTTATTGCAGC-3;

miR9-3p Fw 5'-GAGATTCTCTTGCAATAAGCTAGGTTTTGAGCCAAAGAGAGGC-3',

miR9-3p Rv 5'-GCCTCTCTTTGGCTGAAAACCTAGCTTATTGCAAGAGAATCTC-3'.

WT and mutant inserts were confirmed by sequencing.

### **Rapid Amplification of cDNA Ends (RACE)-PCR**

To identify the 5' and 3' ends of the uc.170+ transcript, total RNA from ESCs was extracted and treated with DNase I (RNase-free) endonuclease, and the SMARTer RACE 5'/3' kit (Clontech) was used to generate RACE-ready cDNA according to the manufacturer's instructions. The cDNA ends were amplified with SeqAmp DNA Polymerase (Takara), and gene-specific primers (GSP1: 5'-AGGGGTGATATGCATGTGCT-3'; GSP2: 5'-TGAGAAGGGGACGAGGGTTGCTACA -3') were used. Furthermore, nested PCR analysis was performed with the nested universal primer provided with the kit

(SMARTer RACE cDNA Amplification kit) and two nested gene-specific primers (NESTED-GSP1: 5'- TGCTGAAGCACCCCTTAAGCCCACT-3'; NESTED-GSP2: 5'-GGGCATACAGCCCCCTCCCCGTA CTC-3'). Mouse heart RNA and transferrin receptor-specific primers provided with the kit were used as reaction controls. The PCR fragments were then run on a 1.5% agarose gel, and DNA was extracted from the gel using a QIAquick Gel Extraction kit (QIAGEN) according to the manufacturer's instructions. The RACE products were then cloned into a TOPO TA pCR2.1 cloning vector (Thermo Fisher Scientific) according to the manufacturer's instructions. The sequences were obtained by using the T7 and GSPs primers and verified by using the UCSC Genome Browser (University of California Santa Cruz).

### **Flow cytometry**

Single cell suspensions of ESC-derived neurons, were obtained using either trypsin-EDTA or TrypleSelect 1x (Gibco), fixed, stained with the appropriated primary and secondary antibodies according to the manufacturer's protocols, and were analysed with a BD FACS CantolITM cytofluorimeter (BD Biosciences). Details and list of antibodies are in Table S4.

### **Cell Cycle and Proliferation assays**

For Cell Cycle analysis, the cells were dissociated to single cell suspension, fixed with cold 70% ethanol before propidium iodide (PI) staining (20 µg/ml) and were analysed by flow cytometry using a BD FACS CantolITM cytofluorimeter (BD Biosciences). Cell viability was measured using the colorimetric CyQuant<sup>®</sup> cell proliferation assay (Invitrogen), following the manufacturer's instructions. Absorbance was analysed at 480–520 nm, using the Fluoroskan Ascent FL Microplate Fluorometer and Luminometer (Thermo Fisher Scientific, Waltham, MA, USA). For the proliferation assay, the Click-iT EdU Flow Cytometry Assay (Invitrogen) was used. Briefly, cells were incubated with 5-ethynyl-2'-deoxyuridine (EdU) (10 µM;

overnight at 37 °C), dissociated, fixed and permeabilized, following the manufacturer's instructions. Samples were analysed at FACS-Canto using the Diva™ software (BD Biosciences, San Jose, CA, USA). For cell division analysis CellTrace™ CFSE Cell Proliferation Kit was used according to the manufacturer's instructions (Thermo Fisher Scientific). CFSE [5-(and-6)-carboxyfluorescein diacetate succinimidyl ester] was used to trace multiple generations using dye dilution by flow cytometry.

### **RNA Extraction, Northern Blot analysis, quantitative RT-PCR and copy number determination**

Total RNAs were isolated using TRIzol Reagent (Thermo Fisher Scientific) following the manufacturer's instructions. The concentration of RNA was determined by 260/280 nm absorbance using a NanoDrop ND-1000 spectrophotometer (Thermo Scientific), and the integrity of RNA was checked using gel electrophoresis.

Agarose gel-based Northern blotting was performed and transferred onto Hybond-*n*+ membrane (Amersham Pharmacia Biotech). Biotinylated probes used were complementary to the sequence of T-UCstem1 (5'-CCTGTGTATAATTGCACTTTGAGTCTTTGCCTCTCTTTG -3') or the U6. Detection Chemiluminescent Nucleic Acid Detection Module (Thermo Fisher Scientific) were used according to the manufacturer's instructions. The size of the detected RNA was determined by using a size marker run on the same gel. Total RNA (1µg) was reverse-transcribed using, QuantiTect Reverse Transcription kit (Qiagen). RT-qPCR was performed using strand-specific primers for T-UCE analysis and random primers for coding-gene expression. A miRCURY LNA Universal RT miR PCR kit (Exiqon) was used for miRNA analysis according to the manufacturer's instructions. Small nuclear RNA U6 was used as a reference for T-UCes and miRNAs. The sequences of primers are reported in Table S3.



The relative amount of specific transcripts was measured by RT-PCR analysis. Briefly, it was performed using an iQ SYBR Green Supermix (BioRad) protocol with a CFX96Deep Well system RealTime PCR Detection System (Bio-Rad), according to the manufacturer's instructions. The copy number of transcripts per cell was calculated by the comparative cycle threshold method presented by Livak and Schmittgen (Livak and Schmittgen, 2001).

### **RNA fractionation**

The RNA fractionation was performed as described by Cabianca DS *et al.* (Cabianca *et al.*, 2012). Briefly, ESC were detached by treating with 1X Trypsin, counted and centrifuged at RT 168 g for 5 min. The pellet was lysed with 175  $\mu\text{l}/10^6$  cells of cold RLN1 solution (50 mM Tris HCl pH 8.0; 140 mM NaCl; 1.5 mM  $\text{MgCl}_2$ ; 0,5% NP-40; 2mM Vanadyl Ribonucleoside Complex; Sigma) and incubated 5 min on ice. Next, the suspension was centrifuged at 4°C and 300 g for 2 min and the supernatant, corresponding to the *cytoplasmic fraction*, was transferred into a new tube and stored in ice. The pellet containing nuclei was extracted with 175  $\mu\text{l}/10^6$  cells of cold RLN2 solution (50 mM Tris HCl pH 8.0; 500 mM NaCl; 1.5 mM  $\text{MgCl}_2$ ; 0,5% NP-40; 2mM Vanadyl Ribonucleoside Complex) and 5 min incubated in ice. The suspension was centrifuged at 4°C and 16360 g for 2 min and the supernatant, corresponding to the *nuclear-soluble fraction*, was transferred into a new tube and stored in ice. The remaining pellet corresponds to the *chromatin-associated fraction*.

Total RNA was extracted by using Trizol reagent (Invitrogen, Carlsbad, CA) according to the manufacturer's instructions; in particular, the extraction from aqueous solutions was followed for the cytoplasmic and nuclear-soluble fractions, whereas the chromatin-associated fraction was considered as a pellet. *Gapdh* and *Xist* were used as quality control of the RNA fractionation.

## **Western Blotting**

Whole cell lysates were prepared with ice-cold immunoprecipitation assay (RIPA) lysis buffer. Detection was performed with ECL reagents (Amersham Biosciences). Details and list of antibodies are in Table S4.

## **Luciferase Reporter Assay and miRNA mimic and Lin28 transfection**

Uc.170+ was cloned into the NotI and XhoI sites in psiCheck™ vector (Promega) immediately downstream Renilla luciferase reporter gene. This plasmid contains a firefly luciferase expression cassette that acts as an internal normalization of luciferase activity. Dual-Luciferase Reporter Assay System (DLR assay system, Promega, Madison, WI) was used to measure luciferase activity of 293FT cells co-transfected with uc.170+ cloned in psiCHECK2 together with miR-9-5p or miR9-3p using lipofectamine 2000 (Invitrogen). Luciferase assays were analyzed based on ratio of Renilla/Firefly to normalize over the cell number and transfection efficiency.

For miRNA mimics and Inhibitors (AntagomiR) transfection, ESCs (200,000 cells/well) were plated in six-well plates and transfected with mimics miR-9-5p/3p or antagomiR-9-5p/3p (Exiqon) and AllStars Negative Control (scrambled) (Exiqon) using RNAiMAX reagent (Invitrogen, cat. 13778150).

NT and T-UCstem1 KD ESCs (200,000cells/well) were also transfected with the empty vector or plasmid expressing Flag-tagged Lin28 (kindly provided by Dr. Silvia Parisi), using lipofectamine 2000 (Invitrogen).

## **EGFP-labelled ESCs and Chimera generation**

GFP was inserted in both NT and T-UCstem1 KD ESCs at the Rosa26 locus by using the R26P-SA-EGFPpuro plasmid (Addgene). Ten days after transfection, puromycin-selected clones were verified for correct self-renewal and differentiation properties. Chimeras were obtained by injecting NT and T-UCstem1 KD GFP-

labelled ESCs (13–16) into 4- to 8-cell-stage embryos using standard techniques. Chimeric mouse generation was performed by morula injection of NT and TUCstem1 KD GFP-labelled ESCs. Resultant embryos were cultured for 48 h *in vitro* and implanted by uterus transfer into pseudopregnant foster mothers using standard methods. Pregnant mice were killed at day E9.5 and whole embryos were photographed with fluorescence microscope. Experiments were done in accordance to the law on animal experimentation (article 7; D.L. 116/92) under the Animal Protocol approved by the Italian Ministry of Health.

### **Teratoma Assay**

ESCs were trypsinized into single-cell suspension and resuspended in phosphatase buffered saline (PBS). ESCs ( $3 \times 10^6$ ) were injected subcutaneously into hind limbs of severe combined immunodeficiency mice (SCID). Teratomas were collected, fixed in 4% PFA, sectioned and stained with hematoxylin/eosin or subjected to immunohistochemistry for the histological analysis.

### **Immunohistochemistry**

Samples were processed with the standard streptavidin–biotin-immunoperoxidase method (DAKO Universal Kit, DAKO Corp., Carpinteria, CA, USA). Diaminobenzidine was used as the final chromogen, and hematoxylin as the nuclear counter stain.

### **Immunofluorescence**

Cells were fixed (4% PFA) and permeabilized (0.1% Triton X-100), where necessary, at room temperature. After incubation with primary antibodies, cells were incubated (1h) with the appropriate secondary antibodies (Alexa Fluor 488 and/or 594 (1:200); Molecular Probes). Details and list of antibodies are in Table S4.

### **Chromatin Immunoprecipitation (ChIP)**

Chromatin immunoprecipitation to detect H3K4me3, H3K27me3, Suz12 and Ezh2 enrichments was performed according to a previously validated protocol (Comes et al., 2013). Briefly,  $1 \times 10^6$  cells for NT and KD ESCs were fixed with formaldehyde at room temperature (RT, 10 min), followed by glycine (125 mM) to stop the crosslinking reaction (RT, 5 min). Nuclear extracts were sonicated using a Covaris S2 system sonicator according to manufacturer's instructions to achieve chromosome fragment lengths of 200-500 bp. After sonication, suitable amount of chromatin was incubated with the specific antibodies (Table S4). Immunoprecipitated complexes were recovered with protein A sepharose and samples were then washed with low and high salt buffers, reverse-crosslinked, and purified using the QIAquick PCR purification kit (Qiagen). Purified DNA was analysed by RT-qPCR using gene-specific primers (Table S3).

### **RNA Immunoprecipitation (RIP)**

Native RNA immunoprecipitation experiments were performed using the Magna RIP™ RNA-Binding Protein Immunoprecipitation Kit (Millipore) according to the manufacturer's instructions. Briefly,  $20 \times 10^6$  NT ESCs were lysed to isolate nuclei in presence of protease and RNase inhibitors, which were then treated with DNaseI. The complex magnetic beads-antibody was prepared and the immunoprecipitation followed for 4-16 hours or overnight. The antibodies anti-Suz12, anti-Ezh2 and anti-IgG used are reported in Table 4. RNAs from the immunoprecipitated and input fractions were purified, retrotranscribed using T-UCstem1-specific oligonucleotide and cDNAs were used for RT-qPCR.

### **Probes used for T-UCstem1 ChIRP**

Biotin-labeled antisense T-UCstem1 DNA probes were designed using the suggested web tool ([www.singlemoleculefish.com](http://www.singlemoleculefish.com)). We compared the probe



positions with the secondary structure prediction of the T-UCstem1. Only the probes located within a region with low probability to form stem were used [ODD probes: 5'-aggagtgtaggtaggattt -3', 5'- agctgggagagtgtgtaa -3'; EVEN probes: 5'-ccttccatggagaatcta -3', 5'- gcactcaacacctttcaa -3'].

## SUPPLEMENTAL FIGURE LEGENDS

### **Figure S1. Microarray validation and bioinformatics analysis of uc.170+ locus (Related to Figure 1 and 2)**

**(A)** RT-qPCR validation of T-UCs and **(B)** microRNAs expression in ESCs and N/GCs. Relative RNA level was normalised to *U6* expression. Data are mean  $\pm$  SEM ( $n=3$  independent experiments); \* $p < 0.01$ , \*\* $p < 0.005$ , \*\*\* $p < 0.001$ . **(C)** Validation of *uc.170+* expression by semiquantitative RT-PCR (sqRT-PCR) performed on total RNA extracted from ESCs or N/GCs. –, RT minus control reactions. *Oct4* and *βIII-tubulin* mRNAs were used as control markers of ESC neural differentiation. PCR amplifications were performed on biological triplicates, and the results of a representative experiment are shown. **(D)** *In silico* prediction alignment of *uc.170+* sequence base pairing with miR-9-5p/3p and relative  $\Delta G$ , performed by *RNAHybrid* software. **(E)** Schematic representation of genomic location of *uc.170* within *Fam172a* host-gene and its relative transcript. The TATA box, INR and TSS bioinformatically predicted are reported. In green are also reported the region targeted by the shRNAs used for the knockdown experiments: Sh1 targets a region within the *uc.170*, the Sh2 and Sh3 target regions at about 200bp and 1kb upstream the *uc.170* respectively.

### **Figure S2. Expression analysis of T-UCstem1 (Related to Figure 2)**

**(A)** Northern blotting analysis showing the expression of T-UCstem1 in Non Targeted (NT) and two independent T-UCstem1 KD ESC clones. Normalization was performed with *U6*. **(B)** T-UCstem1 sequence (1813bp): the red sequence was described by Bejerano et al. (Bejerano et al., 2004). **(C)** T-UCstem1 secondary structure prediction obtained by Minimum Energy Free (MEF) and Centroid algorithms. The binding sites for miR-9-3p/5p are indicated by black arrows.

**Figure S3. Functional characterization of T-UCstem1 KD ESCs (Related to Figure 3)**

**(A)** Cell viability of Control (NT) and two independent T-UCstem1 KD ESC clones measured by the CyQuant<sup>®</sup> assay and expressed as relative fluorescence units (RFU). Data are mean  $\pm$  SEM ( $n=3$  independent experiments); \*\* $p < 0.005$ . **(B)** Time-course analysis of automated cell counting of FBS/LIF/Feeders Control (NT) and T-UCstem1 KD ESCs. Data are mean  $\pm$  SEM ( $n=3$  independent experiments); \*\*\* $p < 0.001$ . **(C-D)** FACS-based analysis of cell division quantification **(C)** by dye dilution (CFSE) in Control (NT) and T-UCstem1 KD ESCs at different time points and **(D)** in two independent T-UCstem1 KD clones at 72hrs. Data are mean  $\pm$  SEM ( $n=3$  independent experiments); \* $p < 0.01$ , \*\* $p < 0.005$ . **(E)** Schematic representation of the experimental procedure. **(F)** RT-qPCR analysis of uc170+ in hESCs transfected with siRNA uc.170+ or scr (100 nmol) for 48h. **(G)** Representative photomicrographs of scrambled and siRNA uc.170+ colonies. Scale bar, 200  $\mu\text{m}$ . **(H)** Automated cell counting of hESCs transfected with siRNA uc.170+ or scr (100 nmol) for 48h. **(I)** RT-qPCR analysis of T-UCstem1 level in KD ESCs transfected with uc170+ cDNA expression vector. NT and KD ESCs were used as positive and negative control, respectively. *U6* was used as a loading control. Data are mean  $\pm$  SEM ( $n=3$  independent experiments); \*\* $p < 0.005$ . **(J)** RT-qPCR of miR9-5p and its target genes in KD ESCs transfected with uc170+ cDNA expression vector. NT and KD ESCs were used as positive and negative control, respectively. Data are mean  $\pm$  SEM ( $n=3$  independent experiments); \*\* $p < 0.005$ , \* $p < 0.01$ . **(K)** Representative photomicrographs of FBS/LIF KD colonies and KD colonies transfected with uc170+ cDNA expression vector. Scale bar, 100  $\mu\text{m}$ . **(L)** FACS-based analysis of cell proliferation quantification by EdU incorporation in NT, KD and KD ESCs upon uc170+ cDNA expression vector or empty vector transfection (48hrs). Representative FACS plots of biological triplicates are shown.

**Figure S4. Functional characterization of T-UCstem1 KD ESCs (Related to Figure 4)**

**(A-B)** RT-qPCR analysis of **(A)** miR-9 and **(B)** its target genes (*Lin28b* and *Tlx1*) in NT and T-UCstem1 KD ESCs transfected with antagomiR-9 5p/3p or scr (100 nmol) at 48hrs after transfection. Data are mean  $\pm$  SEM ( $n=3$  independent experiments); \*\* $p < 0.005$ , \* $p < 0.01$ . **(C)** Automated cell counting of NT and KD ESCs transfected with antagomiR-9 5p/3p or scr (100 nmol) at 48hrs after transfection. Data are mean  $\pm$  SEM ( $n=3$  independent experiments); \*\* $p < 0.005$ , \*\*\* $p < 0.001$ . **(D)** Western blot analysis of Lin28B-Flag in NT, KD and in KD Lin28B overexpressing cells. GAPDH was used as a loading control. **(E)** RT-qPCR analysis of *Lin28b* in NT, in KD and in KD ESCs upon *Lin28B*-Flag/empty vector transfection. **(F-G)** Representative pictures **(F)** of NT and KD ESCs during clonogenic assay **(G)** with relative colony number of NT and KD colonies stained with crystal violet. Scale bar, 200  $\mu\text{m}$ . Data are mean  $\pm$  SEM ( $n=3$  independent experiments); \*\* $p < 0.005$ . **(H)** RT-qPCR analysis of pluripotency-associated genes (*Nanog*, *Sox2* and *Oct4*) in Control (NT) and T-UCstem1 KD in High density/Feeders culture conditions and plated at low density. Data are mean  $\pm$  SEM ( $n=3$  independent experiments); \* $p < 0.01$ , \*\* $p < 0.005$ . **(I)** Representative pictures of NESTIN, BRA and SOX17 (scale bars, 75  $\mu\text{m}$ ) immunostaining in NT ESC colonies. Nuclei were stained with DAPI. **(J)** Representative immunofluorescence of SSEA1 in NT and KD ESC colonies at day 6 after plating in clonogenic assay. Nuclei were stained with DAPI. Scale bars, 75  $\mu\text{m}$ . **(K)** RT-qPCR analysis of pluripotency-associated genes (*Nanog* and *Sox2*) in Control (NT), KD and KD + *2i* (CHIR99021+ PD0325901) ESCs, at day 6 after plating. Data are mean  $\pm$  SEM ( $n=3$  independent experiments); \*\*\* $p < 0.005$ . **(L)** Automated cell counting of NT and KD ESCs and KD + *2i* (CHIR99021+ PD0325901) ESCs, at day 6 after plating. Data are mean  $\pm$  SEM ( $n=3$  independent experiments); \*\*\* $p < 0.001$ .

**Figure S5. Analysis of T-UCstem1 KD ESCs pluripotency *in vitro* and *in vivo* (Related to Figure 4 and 5)**

**(A)** Representative photomicrographs by Discovery.V12 Zeiss microscopy of chimeric embryos from EGFP-labelled KD and WT ESCs injected into morula and dissected at E9.5. **(B)** Time-course expression profiles of mesoderm (*Bra*) and cardiac (*Nkx2.5* and  $\alpha$ MHC) markers in Control (NT) and two independent T-UCstem1 KD clones. Relative RNA level was normalised to *Gapdh* expression. Data are mean  $\pm$  SEM ( $n=3$  independent experiments); \* $p < 0.01$ , \*\* $p < 0.005$ , \*\*\* $p < 0.001$ . **(C)** FACS-based quantification of BRACHIURY (day 8) and MF20 (day 10) positive cells in Control (NT) and KD ESC cardiac differentiation. Data are mean  $\pm$  SEM ( $n=3$  independent experiments).

**Figure S6. Epigenetic analysis of T-UCstem1 KD ESCs (Related to Figure 6)**

**(A)** RT-qPCR of selected developmental genes (*Nestin*, *Gata6* and *Foxa2*) in Control (NT) and two independent T-UCstem1 KD ESC clones. Relative RNA level was normalised to *Gapdh*. Data are mean  $\pm$  SEM ( $n=3$  independent experiments); \*\*\* $p < 0.001$ . **(B)** RT-qPCR analysis of pluripotency and differentiation-associated genes in hESCs transfected with siRNA uc.170+ or scr (100 nmol) for 48h Control (NT). Relative RNA level was normalised to *Gapdh* expression. Data are mean  $\pm$  SEM ( $n=3$  independent experiments); \* $p < 0.01$ , \*\* $p < 0.005$ , \*\*\* $p < 0.001$ . **(C)** H3K4me3/H3K27me3 occupancy at bivalent-associated promoters (*Nestin*, *Gata6* and *Foxa2*) analyzed by Chip-qPCR in Control (NT) and KD ESC clones. Data are mean  $\pm$  SEM ( $n=3$  independent experiments); \*\* $p < 0.01$ , \*\*\* $p < 0.005$ . **(D)** Native RNA immunoprecipitation (n-RIP) of *T-UCstem1* in ESCs, using antibodies against SUZ12, EZH2 or IgG as control. Data are mean  $\pm$  SEM ( $n=3$  independent experiments); \*\* $p < 0.01$ . **(E)** Chip-qPCR of SUZ12 and EZH2 binding at *Nr2f1* promoter in KD and Control (NT) cells. *Myo6* promoter has been reported as control. Data are mean  $\pm$  SEM ( $n=3$  independent experiments); \*\* $p < 0.01$ . **(F)** Western blot analysis of cell

SUZ12 and EZH2 in Control (NT) and two independent T-UCstem1 KD ESC clones.

GAPDH was used as a loading control.

## SUPPLEMENTAL REFERENCES

Bedzhov, I., Leung, C.Y., Bialecka, M., and Zernicka-Goetz, M. (2014). In vitro culture of mouse blastocysts beyond the implantation stages. *Nature protocols* **9**, 2732-2739.

Bejerano, G., Pheasant, M., Makunin, I., Stephen, S., Kent, W.J., Mattick, J.S., and Haussler, D. (2004). Ultraconserved elements in the human genome. *Science* **304**, 1321-1325.

Cabianca, D.S., Casa, V., Bodega, B., Xynos, A., Ginelli, E., Tanaka, Y., and Gabellini, D. (2012). A long ncRNA links copy number variation to a polycomb/trithorax epigenetic switch in FSHD muscular dystrophy. *Cell* **149**, 819-831.

Chambers, I., Silva, J., Colby, D., Nichols, J., Nijmeijer, B., Robertson, M., Vrana, J., Jones, K., Grotewold, L., and Smith, A. (2007). Nanog safeguards pluripotency and mediates germline development. *Nature* **450**, 1230-1234.

Comes, S., Gagliardi, M., Laprano, N., Fico, A., Cimmino, A., Palamidessi, A., De Cesare, D., De Falco, S., Angelini, C., Scita, G., *et al.* (2013). L-Proline induces a mesenchymal-like invasive program in embryonic stem cells by remodeling H3K9 and H3K36 methylation. *Stem Cell Reports* **1**, 307-321.

D'Aniello, C., Fico, A., Casalino, L., Guardiola, O., Di Napoli, G., Cermola, F., De Cesare, D., Tate, R., Cobellis, G., Patriarca, E.J., *et al.* (2015). A novel autoregulatory loop between the Gcn2-Atf4 pathway and (L)-Proline [corrected] metabolism controls stem cell identity. *Cell Death Differ* **22**, 1094-1105.

D'Aniello, C., Fiorenzano, A., Iaconis, S., Liguori, G.L., Andolfi, G., Cobellis, G., Fico, A., and Minchiotti, G. (2013). The G-protein-coupled receptor APJ is expressed in the second heart field and regulates Cerberus-Baf60c axis in embryonic stem cell cardiomyogenesis. *Cardiovasc Res* **100**, 95-104.

Fico, A., Manganeli, G., Simeone, M., Guido, S., Minchiotti, G., and Filosa, S. (2008). High-throughput screening-compatible single-step protocol to differentiate embryonic stem cells in neurons. *Stem Cells Dev* **17**, 573-584.

Gruber, A.R., Lorenz, R., Bernhart, S.H., Neubock, R., and Hofacker, I.L. (2008). The Vienna RNA websuite. *Nucleic acids research* **36**, W70-74.

Guo, G., Yang, J., Nichols, J., Hall, J.S., Eyres, I., Mansfield, W., and Smith, A. (2009). Klf4 reverts developmentally programmed restriction of ground state pluripotency. *Development* **136**, 1063-1069.

Kirkeby, A., Nolbrant, S., Tiklova, K., Heuer, A., Kee, N., Cardoso, T., Ottosson, D.R., Lelos, M.J., Rifes, P., Dunnett, S.B., *et al.* (2017). Predictive Markers Guide Differentiation to Improve Graft Outcome in Clinical Translation of hESC-Based Therapy for Parkinson's Disease. *Cell stem cell* **20**, 135-148.

Kozomara, A., and Griffiths-Jones, S. (2014). miRBase: annotating high confidence microRNAs using deep sequencing data. *Nucleic acids research* **42**, D68-73.

Livak, K.J., and Schmittgen, T.D. (2001). Analysis of relative gene expression data using real-time quantitative PCR and the 2(-Delta Delta C(T)) Method. *Methods* **25**, 402-408.



Nolbrant, S., Heuer, A., Parmar, M., and Kirkeby, A. (2017). Generation of high-purity human ventral midbrain dopaminergic progenitors for in vitro maturation and intracerebral transplantation. *Nature protocols* 12, 1962-1979.

Slutskin, A., Danino, Y.M., Orenstein, Y., Zehavi, Y., Doniger, T., Shamir, R., and Juven-Gershon, T. (2015). ElemeNT: a computational tool for detecting core promoter elements. *Transcription* 6, 41-50.
